# Supplementary material for: Procalcitonin-guided initiation of antibiotics in AECOPD inpatients: study protocol for a multicenter randomised controlled trial
Source: PubMed Central journal article supplement — BMJ Open. 2021 Aug 5;11(8):e049515. doi: 10.1136/bmjopen-2021-049515 (PMC8344287; doi:10.1136/bmjopen-2021-049515), 2021-08-05
Supplement: bmjopen-2021-049515.draft_revisions.pdf [file bmjopen-2021-049515.draft_revisions.pdf]

# BMJ Open

BMJ Open is committed to open peer review. As part of this commitment we make the peer review history of every article we publish publicly available.

When an article is published we post the peer reviewers' comments and the authors' responses online. We also post the versions of the paper that were used during peer review. These are the versions that the peer review comments apply to.

The versions of the paper that follow are the versions that were submitted during the peer review process. They are not the versions of record or the final published versions. They should not be cited or distributed as the published version of this manuscript.

BMJ Open is an open access journal and the full, final, typeset and author-corrected version of record of the manuscript is available on our site with no access controls, subscription charges or pay-per-view fees (<http://bmjopen.bmj.com>).

If you have any questions on BMJ Open's open peer review process please email [info.bmjopen@bmj.com](mailto:info.bmjopen@bmj.com)

# BMJ Open

## Procalcitonin-guided initiation of antibiotics in AECOPD inpatients: a multicenter randomized controlled trial

|                               |                                                                                                                                                                                                                                                                                                                                                                                                                                                                                                                                                                                                                                                   |
|-------------------------------|---------------------------------------------------------------------------------------------------------------------------------------------------------------------------------------------------------------------------------------------------------------------------------------------------------------------------------------------------------------------------------------------------------------------------------------------------------------------------------------------------------------------------------------------------------------------------------------------------------------------------------------------------|
| Journal:                      | <i>BMJ Open</i>                                                                                                                                                                                                                                                                                                                                                                                                                                                                                                                                                                                                                                   |
| Manuscript ID                 | bmjopen-2021-049515                                                                                                                                                                                                                                                                                                                                                                                                                                                                                                                                                                                                                               |
| Article Type:                 | Protocol                                                                                                                                                                                                                                                                                                                                                                                                                                                                                                                                                                                                                                          |
| Date Submitted by the Author: | 27-Jan-2021                                                                                                                                                                                                                                                                                                                                                                                                                                                                                                                                                                                                                                       |
| Complete List of Authors:     | Huang, Lixue; Capital Medical University; China-Japan Friendship Hospital<br>Wang, Jinxiang; Capital Medical University, respiratory and critical care medicine, BeijingnnLuhe Hospital<br>Gu, Xiaoying<br>Sheng, Weili; Department of Pulmonary and Critical Care Medicine<br>Wang, Yeming; Capital Medical University, Department of Pulmonary and Critical Care Medicine; China-Japan Friendship Hospital, Department of Pulmonary and Critical Care Medicine<br>Bin, Cao; Capital Medical University, Department of Pulmonary and Critical Care Medicine; China-Japan Friendship Hospital, Department of Pulmonary and Critical Care Medicine |
| Keywords:                     | Protocols & guidelines < HEALTH SERVICES ADMINISTRATION & MANAGEMENT, Thoracic medicine < INTERNAL MEDICINE, PRIMARY CARE, Clinical trials < THERAPEUTICS                                                                                                                                                                                                                                                                                                                                                                                                                                                                                         |
|                               |                                                                                                                                                                                                                                                                                                                                                                                                                                                                                                                                                                                                                                                   |

SCHOLARONE™  
Manuscripts

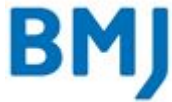

I, the Submitting Author has the right to grant and does grant on behalf of all authors of the Work (as defined in the below author licence), an exclusive licence and/or a non-exclusive licence for contributions from authors who are: i) UK Crown employees; ii) where BMJ has agreed a CC-BY licence shall apply, and/or iii) in accordance with the terms applicable for US Federal Government officers or employees acting as part of their official duties; on a worldwide, perpetual, irrevocable, royalty-free basis to BMJ Publishing Group Ltd ("BMJ") its licensees and where the relevant Journal is co-owned by BMJ to the co-owners of the Journal, to publish the Work in this journal and any other BMJ products and to exploit all rights, as set out in our [licence](#).

The Submitting Author accepts and understands that any supply made under these terms is made by BMJ to the Submitting Author unless you are acting as an employee on behalf of your employer or a postgraduate student of an affiliated institution which is paying any applicable article publishing charge ("APC") for Open Access articles. Where the Submitting Author wishes to make the Work available on an Open Access basis (and intends to pay the relevant APC), the terms of reuse of such Open Access shall be governed by a Creative Commons licence – details of these licences and which [Creative Commons](#) licence will apply to this Work are set out in our licence referred to above.

Other than as permitted in any relevant BMJ Author's Self Archiving Policies, I confirm this Work has not been accepted for publication elsewhere, is not being considered for publication elsewhere and does not duplicate material already published. I confirm all authors consent to publication of this Work and authorise the granting of this licence.

1  
2  
3  
4  
5  
6  
7  
8  
9  
10  
11  
12  
13  
14  
15  
16  
17  
18  
19  
20  
21  
22  
23  
24  
25  
26  
27  
28  
29  
30  
31  
32  
33  
34  
35  
36  
37  
38  
39  
40  
41  
42  
43  
44  
45  
46  
47  
48  
49  
50  
51  
52  
53  
54  
55  
56  
57  
58  
59  
60

1           **Procalcitonin-guided initiation of antibiotics in AECOPD inpatients: a**  
2           **multicenter randomized controlled trial**

3   **Authors:**

4   Lixue Huang 1,2 , Jinxiang Wang 3, Xiaoying Gu 2,4, Weili Sheng 5, Yeming Wang  
5   1,2, Bin Cao 1,2,6,7

6   **Affiliations:**

7   *1 Department of Pulmonary and Critical Care Medicine, Capital Medical University,*  
8   *Beijing, China*

9   *2 Department of Pulmonary and Critical Care Medicine, National Center for*  
10   *Respiratory Medicine, Center of Respiratory Medicine, National Clinical Research*  
11   *Center for Respiratory Diseases, China-Japan Friendship Hospital, Beijing, China*

12   *3 Department of Pulmonary and Critical Care Medicine, Beijing Luhe Hospital,*  
13   *Capital Medical University, Beijing, China*

14   *4 Institute of Clinical Medical Sciences, China-Japan Friendship Hospital, Beijing,*  
15   *China*

16   *5 Department of Pulmonary and Critical Care Medicine, Daxing teaching hospital of*  
17   *capital Medical University, Beijing, China*

18   *6 Institute of Respiratory Medicine, Chinese Academy of Medical Science, Beijing,*  
19   *China*

20   *7 Tsinghua University-Peking University Joint Center for Life Sciences, Beijing, China*

21  
22   **Correspondence author:**

23   Professor Bin Cao

24   E-mail: caobin\_ben@163.com

1  
2  
3  
4 25 **Abstract**

5 26 **Introduction:** Current antibiotic prescription for acute exacerbation of chronic  
6 obstructive pulmonary disease (AECOPD) is generally based on the Anthonisen criteria  
7 in The Global Initiative for Chronic Obstructive Pulmonary Disease guideline, that has  
8 a potential risk of antibiotics overuse. The dilemma is to identify patients who are most  
9 likely to benefit from antibiotics while avoiding unnecessary antibiotic use.  
10 Procalcitonin (PCT), a more sensitive and specific biomarker of bacterial infection than  
11 other conventional laboratory tests, has the potential to determine those patients in  
12 whom antibiotics would be beneficial. It is unclear whether PCT-guided antibiotic  
13 therapy is safe and effective for patients hospitalized with AECOPD. The study  
14 hypothesis is that PCT-guided antibiotic therapy could reduce the antibiotic  
15 prescription rate for AECOPD, compared with the GOLD guideline recommendations,  
16 without negatively impacting the treatment success rate.  
17  
18  
19  
20  
21  
22  
23  
24  
25  
26  
27  
28

29 38 **Methods and analysis:** In this multicenter, open-label, randomized controlled trial  
30 (RCT), we aim to enroll 500 hospitalized patients with AECOPD, that will be randomly  
31 assigned to either a PCT-guided group or a GOLD guideline-guided group. The co-  
32 primary endpoints are antibiotic prescription rate for AECOPD within 30 days post  
33 randomization (superiority design) and treatment success rate at day 30 post  
34 randomization (non-inferiority design). The secondary outcomes include: antibiotic  
35 prescription rate at day 1 post randomization; hospital antibiotic exposure; length of  
36 hospital stay; rate of subsequent exacerbation and hospital readmission; overall  
37 mortality within 30 days post randomization; changes in lung function and the score of  
38 COPD assessment test (CAT) and modified Medical Research Council (mMRC); and  
39 ICU admission rate.  
40  
41  
42  
43  
44  
45  
46  
47  
48

49 49 **Ethics and dissemination:** This trial has been approved by the ethic committee of  
50 China-Japan Friendship Hospital. The findings of the study will be disseminated in  
51 peer-reviewed journals. If the results of the study are positive, PCT-guided antibiotic  
52 therapy is likely to change the guidelines for antibiotic recommendations for patients  
53 with AECOPD.  
54

54 **Trial registration number :** ClinicalTrials.gov: NCT04682899

1  
2  
3  
4 56 **Strengths and limitations of this study**

- 5  
6 57 ➤ The study is a nationwide, multicenter, randomized controlled trial in China with  
7  
8 58 a large sample size.
- 9  
10 59 ➤ The study design conclude two primary outcomes to compare the efficacy and  
11  
12 60 safety between PCT guided antibiotic therapy and current guideline  
13  
14 61 recommendations.
- 15  
16 62 ➤ The present study has the potential to change the current clinical practice regarding  
17  
18 63 the antibiotic prescription recommendations for patients with AECOPD.
- 19  
20 64 ➤ One limitation of the study is open-label. Only outcomes assessor and statisticians  
21  
22 65 are blinded, patients, primary clinicians and laboratory staff are clear to the  
23  
24 66 grouping.
- 25  
26  
27  
28  
29  
30  
31  
32  
33  
34  
35  
36  
37  
38  
39  
40  
41  
42  
43  
44  
45  
46  
47  
48  
49  
50  
51  
52  
53  
54  
55  
56  
57  
58  
59  
60

## 67 **Introduction**

68 Chronic obstructive pulmonary disease (COPD) is currently the fourth leading cause of  
69 death in the world, but is projected to be the third by 2020<sup>1</sup>. In China, COPD is the third  
70 leading cause of death<sup>2</sup> and the overall prevalence in adults aged 40 years or older has  
71 risen from 8.2% (during 2002-04)<sup>3</sup> to 13.7% (during 2012-15)<sup>4</sup>. Additionally, the  
72 estimated total number of individuals aged 20 years or older with COPD in 2015 was  
73 roughly 100 million in China<sup>4</sup>. Acute exacerbations are the most common reason for  
74 hospitalization and death for patients with COPD. The Global Initiative for Chronic  
75 Obstructive Pulmonary Disease (GOLD) guideline<sup>5</sup> notes that exacerbations are mainly  
76 triggered by respiratory viral infections, although bacterial infections and  
77 environmental factors such as pollution and ambient temperature may also initiate  
78 and/or amplify these events. However, for patients with acute exacerbation of COPD  
79 (AECOPD) in the USA and Europe, the antibiotic prescription rate was over 85%<sup>6,7</sup>,  
80 which has a high risk of unnecessary use of antibiotics. Antibiotics overuse wastes  
81 medical resources, drives antimicrobial resistance, may cause side effects, negatively  
82 affects the microbiome of patients, and distracts from potentially more effective  
83 interventions<sup>8</sup>.

84 Identifying AECOPD driven by bacterial infection is necessary prior to antibiotics  
85 prescription. As for acute exacerbation driven by viral infections, antibiotic treatment  
86 is not expected to be effective<sup>9</sup>. The GOLD guidelines have been recommended  
87 antibiotics prescription in patients of Anthonisen I and II<sup>10</sup> with sputum purulence, as  
88 well as patients with mechanical ventilation.<sup>11</sup> The GOLD guidelines assume purulence  
89 of sputum indicates bacterial infection, however, previous trials have shown it was not  
90 a reliable marker for bacterial presence<sup>12,13</sup>. On the basis of guideline recommendations,  
91 antibiotic prescription should be implemented on all patients with AECOPD receiving  
92 mechanical ventilation. This can obviously lead to overuse of antibiotics, particularly  
93 in those with acute exacerbation driven by viral infection or environmental factors.  
94 Thus, wide implementation of the antibiotic recommendations from the GOLD  
95 guidelines have the potential risk of antibiotic overuse, due to diagnostic difficulty in

1  
2  
3  
4 96 distinguishing bacterial infection triggered AECOPD from those driven by other risk  
5  
6 97 factors. Procalcitonin (PCT), a reliable biomarker of bacterial infection, has the  
7  
8 98 potential to guide the prescription of antibiotics. Stolz and colleagues<sup>14</sup> conducted a  
9  
10 99 randomized controlled trial (RCT) to evaluate the efficacy and safety of PCT guidance  
11  
12 100 compared to standard care therapy with antibiotic prescriptions in patients with  
13  
14 101 AECOPD. The study of 208 AECOPD inpatients showed that PCT guidance resulted  
15  
16 102 in reduced antibiotic prescription and exposure compared to standard care therapy, with  
17  
18 103 no difference in secondary outcomes (including success rate, subsequent exacerbation  
19  
20 104 and rehospitalization rates) between the two groups. However, the sample size was  
21  
22 105 calculated according to a single outcome of antibiotic prescription rate from the index  
23  
24 106 exacerbation to the following 6 months and this limited sample size (208 AECOPD  
25  
26 107 inpatients) was insufficiently powered to show whether PCT-guided algorithms do not  
27  
28 108 affect secondary outcomes. Additionally, the recommendation in Stolz's trial for  
29  
30 109 patients with a PCT result between 0.1 to 0.25 ng/ml was decided by clinician  
31  
32 110 themselves, which could bring variation for clinicians with different clinical experience.  
33  
34 111 Evidence from our previous study has shown that patients with PCT level less than 0.1  
35  
36 112 ng/ml did not benefit from the additional antibiotic therapy.<sup>15</sup> PCT guidance, markedly  
37  
38 113 and safely, reduced antibiotic prescriptions or the duration of antibiotic therapy in  
39  
40 114 several previous RCTs conducted in patients with lower respiratory infections<sup>16-18</sup>.  
41  
42 115 However, enrolled patients were not restricted to patients with COPD, but also included  
43  
44 116 patients with community acquired pneumonia, asthma and bronchitis. Due to the lack  
45  
46 117 of confirmatory PCT trials with rigorous methodology for COPD, the current GOLD  
47  
48 118 guideline still recommend antibiotic prescription according to the Anthonisen criteria  
49  
50 119 of 1987<sup>10</sup>.

51  
52 120 In this protocol, we aim to conduct a multicenter RCT to determine the effect of PCT-  
53  
54 121 guided antibiotic therapy compared to the current GOLD guideline recommendations  
55  
56 122 in patients with AECOPD.

## 57 58 59 123 **Methods/design**

60



## 124 **Objective**

125 The primary aim is to determine whether PCT-guided antibiotic therapy will reduce the  
126 antibiotic prescription rate for AECOPD without negatively impacting the treatment  
127 success rate, compared with the GOLD guideline recommendations.

## 128 **Design**

129 This is a nationwide, multicenter, open-label, RCT that will be conducted at 10  
130 hospitals in China. Eligible participants will be randomly assigned to either the PCT-  
131 guided antibiotic therapy (PCT group) or the GOLD guideline antibiotic  
132 recommendations (guideline group) in a ratio of 1:1. Figure 1 shows the flow chart of  
133 the trial. We will address this question in terms of co-primary outcome measures:  
134 antibiotic prescription rate for AECOPD within 30 days post randomization and the  
135 treatment success rate at day 30 post randomization. Between-group differences in  
136 antibiotic prescription rates will be investigated for superiority, while differences in  
137 treatment success rates for non-inferiority. The study design follows the Standard  
138 Protocol Items: Recommendations for Interventional Trials statement  
139 recommendations.<sup>19</sup> The items from the trial registration data set are recorded in the  
140 online supplementary material 1.

## 142 **Population and eligibility criteria**

143 Recruitment will be conducted at the department of the pulmonary and critical care  
144 medicine of the 10 tertiary teaching hospitals in China. The detailed information of  
145 these hospitals are shown in online supplementary material 2. The inclusion criteria and  
146 exclusion criteria are shown in Table 1.

## 148 **Ethics and informed consent**

149 The Ethics Committee of China-Japan Friendship Hospital has approved the trial (file  
150 number: 2020-87-K51). Written informed consent (online supplementary material 3)  
151 will be required from eligible patients at each participating centers, or their legal

1  
2  
3  
4 152 representative if they were unable to provide consent.

5  
6 153 **Randomization and allocation concealment**

7  
8 154 Eligible patients will be randomly assigned (1:1) to either the PCT group or the  
9  
10 155 guideline group within 24 hours after hospitalization. The random sequence was  
11  
12 156 generated by a statistician using SAS software, version 9.4 and stored by a manager  
13  
14 157 from the China-Japan friendship hospital, both of them are not involved in the trial.  
15  
16 158 Once an eligible participant is recruited in each center, the site investigator will request  
17  
18 159 a random number by telephone from the manager. The investigator receive the group  
19  
20 160 information based on the random number, and then conducted next step according to  
21  
22 161 trial protocol. The participants, health care providers and laboratory staff are known to  
23  
24 162 the patient allocation. Outcomes assessors and statisticians will be blinded to the study  
25  
26 163 assignment.

27  
28 164 **Interventions**

29  
30 165 Participants in the PCT group will complete a PCT test within 2 hours after  
31  
32 166 randomization and the results will be sent back to the clinician by laboratory through  
33  
34 167 the internal network of the hospital. The prescribing clinician will use the results of the  
35  
36 168 PCT to help guide their antibiotic prescription decision. Participants in the guideline  
37  
38 169 group will also need to complete a PCT test within 2 hours after randomization,  
39  
40 170 however, the laboratory will save the results and do not sent back to the clinician. The  
41  
42 171 detailed antibiotic recommendations of both groups are shown in Table 2. Other  
43  
44 172 therapies for AECOPD in both groups will be based on the GOLD guideline  
45  
46 173 recommended standard care. All participating centers will be provided the 2020 version  
47  
48 174 of the GOLD guideline.

49  
50 175 To ensure the veracity and reliability of results, each center may adopt any one of the  
51  
52 176 following three validated assays to measure the value of PCT: B·R·A·H·M·S PCT  
53  
54 177 sensitive KRYPTOR assay (Thermo Fisher Scientific, Hennigsdorf, Germany), Roche  
55  
56 178 Elecsys B·R·A·H·M·S PCT assay, or the BioMérieux's Vidas B·R·A·H·M·S PCT  
57  
58 179 assay. Each center will perform standard calibration procedures on the instruments and  
59  
60 180 analyze two levels of quality control materials with each sample run. Procedure time  
181 for all these assays is less than 30 minutes. Each participating center will have access

182 to a Kryptor machine, a suitable Vidas or Roche immunoanalyser to expedite the  
183 sample analysis and rapidly provide PCT results for guidance in the protocol.

## 184 **Outcomes**

### 185 Primary endpoints

- 186 - Antibiotic prescription rate within 30 days post randomization, expressed as the  
187 proportion of patients receiving antibiotics for AECOPD. The objective of  
188 antibiotic prescription is to treat AECOPD during hospitalization or after discharge;  
189 antibiotics used for other reasons are excluded, such as new urinary tract infection.
- 190 - Treatment success rate at day 30 post randomization. Treatment success is defined  
191 as cure (a complete resolution of signs and symptoms associated with the  
192 exacerbation) or improvement (a resolution or reduction of the symptoms and signs  
193 associated with the exacerbation, without new symptoms or signs).<sup>20</sup> Treatment  
194 failure is defined as absence of resolution of symptoms and signs; worsening of  
195 symptoms and signs; occurrence of new symptoms and signs associated with the  
196 primary or with a new infection; or death of any reason after randomization.<sup>20</sup> Face  
197 to face consult will be performed on day 30 post randomization.

### 199 Secondary endpoints

- 200 - Antibiotic prescription rate at day 1 post randomization
- 201 - Hospital antibiotic exposure, expressed as the number of days of antibiotic  
202 consumed for AECOPD and the proportion of patients receiving antibiotic for  
203 AECOPD during hospitalization
- 204 - Length of hospital stay, expressed as the number of days of hospitalization
- 205 - Rate of subsequent exacerbation, hospital readmission and overall mortality within  
206 30 days post randomization
- 207 - Change in lung function, COPD assessment test (CAT)<sup>21</sup> and modified Medical  
208 Research Council (mMRC) dyspnea scale<sup>22</sup>, expressed as the difference between  
209 the baseline of hospital admission and day 30 post randomization.
- 210 - ICU admission rate

211

## 212 **Follow-up**

213 The total follow-up period is 30 days post randomization. The follow-up items at  
214 multiple time points are shown in Table 3. Notably, we will contact all the eligible  
215 participants and ask them to participate a face-to-face interview at each participating  
216 center on the day 30 post randomization.

## 217 **Adverse events**

218 Choice and duration of antibiotics and other pharmacological treatments including  
219 bronchodilators and glucocorticoids in both groups are all based on current guideline  
220 recommendations. Study intervention will not change the daily clinical treatment  
221 therapy, and consequently will not increase the risk of adverse events. Adverse events  
222 will be collected and reported as part of routine follow-up. All events fulfilling the  
223 definition of a serious adverse event (SAE), including death, that occur during research  
224 period will be reported to the research center expert committee within 24 h post event  
225 occurrence.

## 226 **Sample size**

227 This study is designed to have sufficient power to detect a 20% reduction from an  
228 estimated 70% that consume antibiotics for the AECOPD during the 30 days following  
229 randomization. In the Schuetz's RCT to compare PCT guide antibiotic prescription with  
230 guideline therapy, subgroup analysis in patients with AECOPD shown that the 30 days  
231 prescription rate of guideline group and procalcitonin group was 69.9% and 48.7%,  
232 respectively<sup>18</sup>. Detecting a difference in proportions between 0.70 and 0.50 at the 5%  
233 significance level with 90% power requires a total 242 participants. Assuming a drop-  
234 out rate of 20%, we will need to enroll 302 participants. In addition, we aim to have  
235 sufficient power to demonstrate that participants managed with PCT-guided strategy  
236 are non-inferior, compared to those managed with guideline recommendations, in terms  
237 of treatment success rate at day 30 post randomization. A limited number of studies  
238 have reported the success rate at day 30 after randomization in patients with

1  
2  
3  
4 239 AECOPD<sup>14,23</sup>. According to prior trials in terms of hospitalized patients with AECOPD,  
5  
6 240 Stolz<sup>14</sup> reported the short-term treatment success rate as 83.9% (from 14 to 21 days post  
7  
8 241 randomization) and Prins<sup>23</sup> determined the treatment failure rate at day 30 after  
9  
10 242 randomization as 20.3%. Based on these data and assuming a treatment success rate of  
11  
12 243 0.8 at day 30 following randomization, a non-inferior margin of 0.1<sup>24</sup>, based on a one-  
13  
14 244 sided significance level of 0.05 and 80% power, would require 396 participants. Again  
15  
16 245 with a drop-out rate of 20%, 495 participants will need to be included. Finally,  
17  
18 246 considering these two primary endpoints, we will aim to recruit 500 participants in total  
19  
20 247 to the study.  
21  
22 248

### 23 249 **Data collection and management**

25 250 An independent clinician from each center, unknown the group information, will collect  
26  
27 251 the data through a prespecified case report form (CRF) at multiple time points. The data  
28  
29 252 filled in the CRF should be accurate, complete, timely and reliable. All centers in our  
30  
31 253 study are qualified by the 'Good Clinical Practice (GCP) training' of the State Food  
32  
33 254 and Drug Administration for compliance in the training. To increase study awareness  
34  
35 255 and protocol adherence, we will convene principle investigator in each center and  
36  
37 256 organize a face-to-face meeting to discuss the study protocol before study initiation.  
38  
39 257 Two experienced data managers from the China-Japan hospital monthly check the CRF  
40  
41 258 of each center, track clinicians' antibiotic prescription decisions in both groups and  
42  
43 259 assess adherence to the protocol. They will ask investigators to resolve any queries  
44  
45 260 identified, record the reasons for non-adherence and provide regular feedback to every  
46  
47 261 center. To solve the potential problems and grantee the quality of research, principle  
48  
49 262 investigator at each center will gather and conduct an online meeting every month. All  
50  
51 263 randomized patients should be followed up until 30 days post randomization.

### 52 264

### 54 265 **Data analysis**

57 266 Participants' characteristics and clinical measures will be described by frequencies and  
58  
59 267 percentages, means and standard deviations, or medians and interquartile ranges as  
60

1  
2  
3  
4 268 appropriate. There will be no planned interim analysis. All analysis will be based on  
5  
6 269 the ITT population, including all randomized participants. Missing data was considered  
7  
8 270 using multiple imputation. All analyses will be completed using SAS, version 9.4 (SAS  
9  
10 271 Institute).

#### 11 12 272 Primary analysis

- 13  
14 273 - The first primary analysis will aim to compare the rate of antibiotic prescription  
15  
16 274 within 30 days between PCT group and guideline group. A two-sided 95%-  
17  
18 275 confidence interval will be computed for the difference in antibiotic prescription  
19  
20 276 rate for both arms.
- 21  
22 277 - The second primary analysis will compare the difference in proportions of clinical  
23  
24 278 treatment success at day 30 between both groups, relative to a 10% non-inferiority  
25  
26 279 margin, and construct a two-sided 90% confidence interval for the difference in  
27  
28 280 proportions. Non-inferiority will be declared if the lower limit of the confidence  
29  
30 281 interval exceeds -10%.

#### 31 32 282 33 34 283 Secondary analysis

35  
36 284 Secondary outcomes will be analyzed in a similar manner to the primary outcomes,  
37  
38 285 with linear, logistic, and Poisson regression models fitted as appropriate. All tests will  
39  
40 286 be two-sided, with  $p$  value less than 0.05 deemed statistically significant.

#### 41 42 287 **Patient and public involvement**

43  
44 288 No patients or public involved in the present study. The results of this study will be  
45  
46 289 published by the investigators in relevant scientific peer-reviewed journals, no matter  
47  
48 290 the study findings.

#### 49 50 291 51 52 292 **Discussion**

53  
54 293 AECOPD are important events in the management of COPD because they negatively  
55  
56 294 impact health status, rates of hospitalization and readmission, and disease progression.  
57  
58 295 Over 85% of patients presenting with AECOPD have been prescribed antibiotics in the  
59  
60 296 USA<sup>6</sup> and Europe<sup>7</sup>. However, not all acute exacerbations are driven by bacteria

1  
2  
3  
4 297 infection, viral infections and environmental factors are currently main predisposing  
5  
6 298 factors. Current antibiotic prescribing is generally based on the criteria outlined by  
7  
8 299 Anthonisen and colleagues in 1987<sup>10</sup> that includes increased dyspnea, increased sputum  
9  
10 300 volume and increased sputum purulence. The GOLD guideline recommends the use of  
11  
12 301 antibiotics in patients who have all three criteria or, in patients who have two criteria  
13  
14 302 when sputum purulence is one of them, or in patients who require mechanical  
15  
16 303 ventilation. However, whether antibiotic therapy according to Anthonisen criteria will  
17  
18 304 benefit patients is unclear. Some randomized trials have found that only patients with  
19  
20 305 increased sputum purulence benefit from antibiotic therapy with amoxicillin–  
21  
22 306 clavulanate, regardless of the presence or absence of the other two criteria<sup>25,26</sup>. In  
23  
24 307 another randomized trial, doxycycline was not superior to placebo in any Anthonisen  
25  
26 308 criteria–defined subgroup, including among patients with purulent sputum.<sup>27</sup> Thus,  
27  
28 309 Anthonisen criteria have insufficient diagnostic accuracy to predict which patients can  
29  
30 310 safely be managed without antibiotics.

31  
32 311 The dilemma is to identify patients who are most likely to benefit from antibiotics while  
33  
34 312 avoiding unnecessary antibiotic use. Procalcitonin, a biomarker of bacterial infection  
35  
36 313 with higher sensitivity and specificity than conventional laboratory tests<sup>28-30</sup>, would  
37  
38 314 have the potential to distinguish patients in whom antibiotics would be beneficial and  
39  
40 315 guide their duration of use. Due to the small study populations and multiple subgroups  
41  
42 316 analysis of lower respiratory tract infection in previous studies<sup>14,16-18</sup>, it is unclear  
43  
44 317 whether PCT-guided antibiotic therapy is safe and effective for patients with AECOPD.  
45  
46 318 PCT-based protocols may be clinically effective; however, confirmatory trials with  
47  
48 319 rigorous methodology are still required<sup>31</sup>.

49  
50  
51 320 In our trial, we aim to evaluate whether PCT-guided antibiotic therapy will reduce the  
52  
53 321 antibiotic prescription rate for patients with AECOPD, in comparison to the GOLD  
54  
55 322 guideline recommendations, without negatively impacting the treatment success rate.  
56  
57 323 If the results of the study are positive (i.e. a significant reduction in antibiotic  
58  
59 324 prescribing with no evidence of significant impairment in the treatment success rate),  
60



1  
2  
3  
4 325 PCT-guided antibiotic therapy is likely to change the guidelines for antibiotic  
5  
6 326 recommendations for patients with AECOPD.  
7

8  
9 327 **Contributors** BC, JW and LH conceived and designed the study. YW and WS  
10  
11 328 provided suggestions for the study design. XG performed the sample size calculation.  
12  
13 329 LH and JW drafted and edited the manuscript. All authors have contributed to the  
14  
15 330 revision of the draft and have read and approved the final version.  
16

17  
18 331 **Funding** This study was supported by Chinese Academy of Medical Sciences  
19  
20 332 Innovation Fund for Medical Sciences (CIFMS 2018-I2M-1-003 and 2020-I2M-  
21  
22 333 CoV19-005).  
23

24  
25 334 **Disclaimer** The funder had no role in the design of the protocol, the conduction of the  
26  
27 335 trial, or the analyses or reporting of the data.  
28

29  
30 336 **Competing interests** None declared.  
31

32  
33 337 **Patient consent for publication** Not required  
34  
35  
36  
37  
38  
39  
40  
41  
42  
43  
44  
45  
46  
47  
48  
49  
50  
51  
52  
53  
54  
55  
56  
57  
58  
59  
60



## References

1. Lozano R, Naghavi M, Foreman K, et al. Global and regional mortality from 235 causes of death for 20 age groups in 1990 and 2010: a systematic analysis for the Global Burden of Disease Study 2010. *Lancet*. 2012;380(9859):2095-2128.
2. Zhou M, Wang H, Zhu J, et al. Cause-specific mortality for 240 causes in China during 1990-2013: a systematic subnational analysis for the Global Burden of Disease Study 2013. *Lancet*. 2016;387(10015):251-272.
3. Zhong N, Wang C, Yao W, et al. Prevalence of chronic obstructive pulmonary disease in China: a large, population-based survey. *Am J Respir Crit Care Med*. 2007;176(8):753-760.
4. Wang C, Xu J, Yang L, et al. Prevalence and risk factors of chronic obstructive pulmonary disease in China (the China Pulmonary Health [CPH] study): a national cross-sectional study. *Lancet*. 2018;391(10131):1706-1717.
5. Global Initiative for Chronic Obstructive Lung Disease. Global strategy for the diagnosis, management, and prevention of chronic obstructive pulmonary disease. GOLD, 2020, ([http:// www.goldcopd.org](http://www.goldcopd.org)).
6. Lindenauer PK, Pekow P, Gao S, Crawford AS, Gutierrez B, Benjamin EM. Quality of care for patients hospitalized for acute exacerbations of chronic obstructive pulmonary disease. *Ann Intern Med*. 2006;144(12):894-903.
7. Lopez-Campos JL, Hartl S, Pozo-Rodriguez F, Roberts CM, European CAT. Antibiotic Prescription for COPD Exacerbations Admitted to Hospital: European COPD Audit. *PLoS One*. 2015;10(4):e0124374.
8. Butler CC, Gillespie D, White P, et al. C-Reactive Protein Testing to Guide Antibiotic Prescribing for COPD Exacerbations. *N Engl J Med*. 2019;381(2):111-120.
9. Rohde GG. Prudent use of antibiotics: acute exacerbation of COPD as an example. *Eur Respir J*. 2010;36(5):983-985.
10. Anthonisen NR, Manfreda J, Warren CP, Hershfield ES, Harding GK, Nelson

- 1  
2  
3  
4 NA. Antibiotic therapy in exacerbations of chronic obstructive pulmonary  
5 disease. *Ann Intern Med.* 1987;106(2):196-204.  
6  
7  
8 11. Global Initiative for Chronic Obstructive Lung Disease. Global strategy for the  
9 diagnosis, management, and prevention of chronic obstructive pulmonary  
10 disease. GOLD, 2020.  
11  
12  
13 12. Brusse-Keizer MG, Grotenhuis AJ, Kerstjens HA, et al. Relation of sputum  
14 colour to bacterial load in acute exacerbations of COPD. *Respiratory medicine.*  
15 2009;103(4):601-606.  
16  
17  
18 13. Daniels JM, de Graaff CS, Vlaspoolder F, Snijders D, Jansen HM, Boersma WG.  
19 Sputum colour reported by patients is not a reliable marker of the presence of  
20 bacteria in acute exacerbations of chronic obstructive pulmonary disease.  
21 *Clinical microbiology and infection : the official publication of the European*  
22 *Society of Clinical Microbiology and Infectious Diseases.* 2010;16(6):583-588.  
23  
24  
25 14. Stolz D, Christ-Crain M, Bingisser R, et al. Antibiotic treatment of  
26 exacerbations of COPD: a randomized, controlled trial comparing  
27 procalcitonin-guidance with standard therapy. *Chest.* 2007;131(1):9-19.  
28  
29  
30 15. Wang JX, Zhang SM, Li XH, Zhang Y, Xu ZY, Cao B. Acute exacerbations of  
31 chronic obstructive pulmonary disease with low serum procalcitonin values do  
32 not benefit from antibiotic treatment: a prospective randomized controlled trial.  
33 *International journal of infectious diseases : IJID : official publication of the*  
34 *International Society for Infectious Diseases.* 2016;48:40-45.  
35  
36  
37 16. Christ-Crain M, Jaccard-Stolz D, Bingisser R, et al. Effect of procalcitonin-  
38 guided treatment on antibiotic use and outcome in lower respiratory tract  
39 infections: cluster-randomised, single-blinded intervention trial. *Lancet.*  
40 2004;363(9409):600-607.  
41  
42  
43 17. Kristoffersen KB, Sogaard OS, Wejse C, et al. Antibiotic treatment interruption  
44 of suspected lower respiratory tract infections based on a single procalcitonin  
45 measurement at hospital admission--a randomized trial. *Clinical microbiology*  
46 *and infection : the official publication of the European Society of Clinical*  
47 *Microbiology and Infectious Diseases.* 2009;15(5):481-487.  
48  
49  
50  
51  
52  
53  
54  
55  
56  
57  
58  
59  
60

18. Schuetz P, Christ-Crain M, Thomann R, et al. Effect of procalcitonin-based guidelines vs standard guidelines on antibiotic use in lower respiratory tract infections: the ProHOSP randomized controlled trial. *JAMA*. 2009;302(10):1059-1066.
19. Chan AW, Tetzlaff JM, Gotzsche PC, et al. SPIRIT 2013 explanation and elaboration: guidance for protocols of clinical trials. *BMJ (Clinical research ed)*. 2013;346:e7586.
20. Chow AW, Hall CB, Klein JO, Kammer RB, Meyer RD, Remington JS. Evaluation of new anti-infective drugs for the treatment of respiratory tract infections. Infectious Diseases Society of America and the Food and Drug Administration. *Clin Infect Dis*. 1992;15 Suppl 1:S62-88.
21. Jones PW, Harding G, Berry P, Wiklund I, Chen WH, Kline Leidy N. Development and first validation of the COPD Assessment Test. *Eur Respir J*. 2009;34(3):648-654.
22. Fletcher CM. Standardised questionnaire on respiratory symptoms: a statement prepared and approved by the MRC Committee on the Aetiology of Chronic Bronchitis (MRC breathlessness score). *BMJ* 1960; 2: 1662.
23. Prins HJ, Duijkers R, Lutter R, et al. Blood eosinophilia as a marker of early and late treatment failure in severe acute exacerbations of COPD. *Respiratory medicine*. 2017;131:118-124.
24. Rohde GG, Koch A, Welte T, group As. Randomized double blind placebo-controlled study to demonstrate that antibiotics are not needed in moderate acute exacerbations of COPD--the ABACOPD study. *BMC pulmonary medicine*. 2015;15:5.
25. Llor C, Moragas A, Hernandez S, Bayona C, Miravittles M. Efficacy of antibiotic therapy for acute exacerbations of mild to moderate chronic obstructive pulmonary disease. *Am J Respir Crit Care Med*. 2012;186(8):716-723.
26. Miravittles M, Moragas A, Hernandez S, Bayona C, Llor C. Is it possible to identify exacerbations of mild to moderate COPD that do not require antibiotic

- 1  
2  
3  
4 treatment? *Chest*. 2013;144(5):1571-1577.
- 5  
6 27. van Velzen P, Ter Riet G, Bresser P, et al. Doxycycline for outpatient-treated  
7 acute exacerbations of COPD: a randomised double-blind placebo-controlled  
8 trial. *Lancet Respir Med*. 2017;5(6):492-499.
- 9  
10  
11 28. Assicot M, Gendrel D, Carsin H, Raymond J, Guilbaud J, Bohuon C. High  
12 serum procalcitonin concentrations in patients with sepsis and infection. *Lancet*.  
13 1993;341(8844):515-518.
- 14  
15  
16  
17 29. Harbarth S, Holeckova K, Froidevaux C, et al. Diagnostic value of procalcitonin,  
18 interleukin-6, and interleukin-8 in critically ill patients admitted with suspected  
19 sepsis. *Am J Respir Crit Care Med*. 2001;164(3):396-402.
- 20  
21  
22  
23 30. Simon L, Gauvin F, Amre DK, Saint-Louis P, Lacroix J. Serum procalcitonin  
24 and C-reactive protein levels as markers of bacterial infection: a systematic  
25 review and meta-analysis. *Clin Infect Dis*. 2004;39(2):206-217.
- 26  
27  
28  
29 31. Mathioudakis AG, Chatzimavridou-Grigoriadou V, Corlateanu A, Vestbo J.  
30 Procalcitonin to guide antibiotic administration in COPD exacerbations: a meta-  
31 analysis. *European respiratory review : an official journal of the European*  
32 *Respiratory Society*. 2017;26(143).
- 33  
34  
35  
36  
37  
38  
39  
40  
41  
42  
43  
44  
45  
46  
47  
48  
49  
50  
51  
52  
53  
54  
55  
56  
57  
58  
59  
60

Table 1. Eligibility criteria

| Inclusion criteria                                                         | Exclusion criteria                                                                             |
|----------------------------------------------------------------------------|------------------------------------------------------------------------------------------------|
| - Hospitalized patients with AECOPD                                        | - Fever, Axillary temperature $\geq 38^{\circ}\text{C}$                                        |
| - $\geq 40$ years of age                                                   | - Pneumonia identified by X-Ray or CT of the chest                                             |
| - Able to understand and communicate to ensure the completion of the trial | - Severe respiratory failure requiring admittance to ICU                                       |
| - Voluntary participation and provide written informed consent             | - Concurrent infection at another site (e.g. urinary tract infection)                          |
|                                                                            | - Immunosuppression secondary to chemotherapy, AIDS or malignant tumor of blood system         |
|                                                                            | - Comorbidities requiring corticosteroids (prednisone 30mg/d or equivalent more than 30 days ) |
|                                                                            | - Invasive mechanical ventilation                                                              |
|                                                                            | - Patients with malignant tumors receiving chemotherapy or radiotherapy                        |
|                                                                            | - Pregnancy                                                                                    |
|                                                                            | - Participation in another clinical trial                                                      |
|                                                                            | - Previously enrollment into the study                                                         |
|                                                                            | - Refuse to attend                                                                             |

AECOPD: acute exacerbation of chronic obstructive pulmonary disease; CT: computer tomography; ICU: intensive care unit.

Table 2. Antibiotic prescription strategy in both arms

| GOLD guideline-guided antibiotic recommendations                                                                                                                                                                                                                                             |                      |
|----------------------------------------------------------------------------------------------------------------------------------------------------------------------------------------------------------------------------------------------------------------------------------------------|----------------------|
| Patients with exacerbations of COPD who have three cardinal symptoms: increase in dyspnea, sputum volume, and sputum purulence; have two of the cardinal symptoms, if increased purulence of sputum is one of the two symptoms; or require mechanical ventilation (invasive or noninvasive). |                      |
| PCT-guided antibiotic regimen                                                                                                                                                                                                                                                                |                      |
| PCT<0.1ng/ml                                                                                                                                                                                                                                                                                 | Strongly discouraged |
| PCT (0.1-0.25ng/ml) and no sputum purulence                                                                                                                                                                                                                                                  | discouraged          |
| PCT (0.1-0.25ng/ml) and sputum purulence                                                                                                                                                                                                                                                     | Recommended          |
| PCT>0.25 ng/ml                                                                                                                                                                                                                                                                               | Strongly recommended |

PCT: procalcitonin; GOLD: The Global Initiative for Chronic Obstructive Pulmonary Disease.

Table 3. Schedule of assessments and data collection

| Assessment                       | At time of consent | Day 1<br>(face to face) | Day 3<br>(face to face) | Day 14<br>(face to face or telephone) | Day 30<br>(face to face) |
|----------------------------------|--------------------|-------------------------|-------------------------|---------------------------------------|--------------------------|
| Assessment of eligibility        | ×                  |                         |                         |                                       |                          |
| Written informed consent         | ×                  |                         |                         |                                       |                          |
| Basic information                | ×                  |                         |                         |                                       |                          |
| Medication history               | ×                  |                         |                         |                                       |                          |
| Physical examination             | ×                  |                         | ×                       |                                       | ×                        |
| PCT level                        | ×                  |                         |                         |                                       |                          |
| CAT score                        | ×                  |                         |                         |                                       | ×                        |
| mMRC score                       | ×                  |                         |                         |                                       | ×                        |
| Antibiotic prescription          | ×                  | ×                       | ×                       | ×                                     | ×                        |
| Other medicine for AECOPD        | ×                  | ×                       | ×                       | ×                                     | ×                        |
| Sputum gram staining and culture | ×                  |                         |                         |                                       |                          |
| Lung function                    | ×                  |                         |                         |                                       | ×                        |
| Assessment of therapeutic        |                    | ×                       | ×                       | ×                                     | ×                        |
| Adverse effects                  | ×                  | ×                       | ×                       | ×                                     | ×                        |
| Length of hospital stay          |                    |                         |                         |                                       | ×                        |
| Mortality                        |                    |                         |                         |                                       | ×                        |

PCT: procalcitonin; CAT: COPD assessment test; mMRC; modified Medical Research Council.

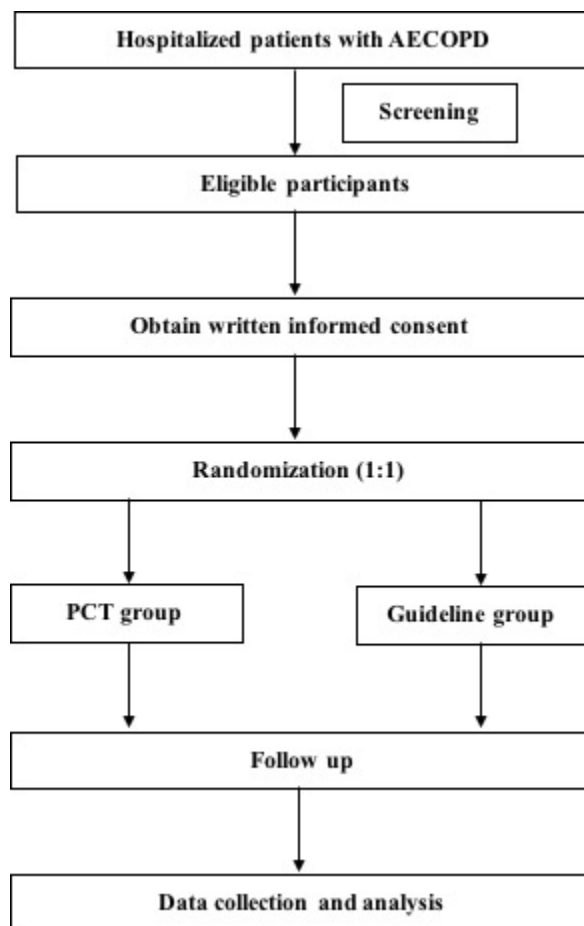

Figure 1 The flow chart of enrolled participants.

103x162mm (72 x 72 DPI)



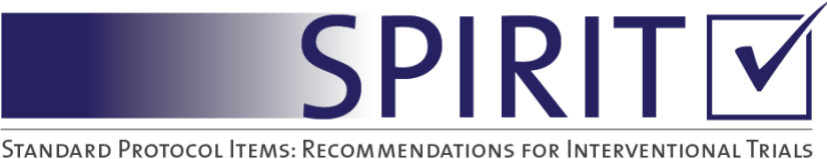

SPIRIT 2013 Checklist: Recommended items to address in a clinical trial protocol and related documents\*

| Section/item                      | Item No | Description                                                                                                                                                                                                                                                                              | Addressed on page number |
|-----------------------------------|---------|------------------------------------------------------------------------------------------------------------------------------------------------------------------------------------------------------------------------------------------------------------------------------------------|--------------------------|
| <b>Administrative information</b> |         |                                                                                                                                                                                                                                                                                          |                          |
| Title                             | 1       | Descriptive title identifying the study design, population, interventions, and, if applicable, trial acronym                                                                                                                                                                             | _____ 1 _____            |
| Trial registration                | 2a      | Trial identifier and registry name. If not yet registered, name of intended registry                                                                                                                                                                                                     | _____ 2 _____            |
|                                   | 2b      | All items from the World Health Organization Trial Registration Data Set                                                                                                                                                                                                                 | _____ 2 _____            |
| Protocol version                  | 3       | Date and version identifier                                                                                                                                                                                                                                                              | 20200101-<br>Version1.0  |
| Funding                           | 4       | Sources and types of financial, material, and other support                                                                                                                                                                                                                              | _____ 13 _____           |
| Roles and responsibilities        | 5a      | Names, affiliations, and roles of protocol contributors                                                                                                                                                                                                                                  | _____ 1,13 _____         |
|                                   | 5b      | Name and contact information for the trial sponsor                                                                                                                                                                                                                                       | _____ 13 _____           |
|                                   | 5c      | Role of study sponsor and funders, if any, in study design; collection, management, analysis, and interpretation of data; writing of the report; and the decision to submit the report for publication, including whether they will have ultimate authority over any of these activities | _____ 13 _____           |
|                                   | 5d      | Composition, roles, and responsibilities of the coordinating centre, steering committee, endpoint adjudication committee, data management team, and other individuals or groups overseeing the trial, if applicable (see Item 21a for data monitoring committee)                         | _____ 10 _____           |

1 **Introduction**

2

3 Background and rationale 6a Description of research question and justification for undertaking the trial, including summary of relevant studies (published and unpublished) examining benefits and harms for each intervention \_\_\_\_\_ 4,5 \_\_\_\_\_

4

5

6 6b Explanation for choice of comparators \_\_\_\_\_ 4,5 \_\_\_\_\_

7

8 Objectives 7 Specific objectives or hypotheses \_\_\_\_\_ 6 \_\_\_\_\_

9

10 Trial design 8 Description of trial design including type of trial (eg, parallel group, crossover, factorial, single group), allocation ratio, and framework (eg, superiority, equivalence, noninferiority, exploratory) \_\_\_\_\_ 6 \_\_\_\_\_

11

12

13

14 **Methods: Participants, interventions, and outcomes**

15

16 Study setting 9 Description of study settings (eg, community clinic, academic hospital) and list of countries where data will be collected. Reference to where list of study sites can be obtained \_\_\_\_\_ 6 \_\_\_\_\_

17

18

19 Eligibility criteria 10 Inclusion and exclusion criteria for participants. If applicable, eligibility criteria for study centres and individuals who will perform the interventions (eg, surgeons, psychotherapists) \_\_\_\_\_ 6 \_\_\_\_\_

20

21

22 Interventions 11a Interventions for each group with sufficient detail to allow replication, including how and when they will be administered \_\_\_\_\_ 7 \_\_\_\_\_

23

24

25 11b Criteria for discontinuing or modifying allocated interventions for a given trial participant (eg, drug dose change in response to harms, participant request, or improving/worsening disease) \_\_\_\_\_ 7 \_\_\_\_\_

26

27

28 11c Strategies to improve adherence to intervention protocols, and any procedures for monitoring adherence (eg, drug tablet return, laboratory tests) \_\_\_\_\_ 7 \_\_\_\_\_

29

30

31 11d Relevant concomitant care and interventions that are permitted or prohibited during the trial \_\_\_\_\_ 7 \_\_\_\_\_

32

33

34 Outcomes 12 Primary, secondary, and other outcomes, including the specific measurement variable (eg, systolic blood pressure), analysis metric (eg, change from baseline, final value, time to event), method of aggregation (eg, median, proportion), and time point for each outcome. Explanation of the clinical relevance of chosen efficacy and harm outcomes is strongly recommended \_\_\_\_\_ 8 \_\_\_\_\_

35

36

37

38

39

40 Participant timeline 13 Time schedule of enrolment, interventions (including any run-ins and washouts), assessments, and visits for participants. A schematic diagram is highly recommended (see Figure) \_\_\_\_\_ 6,7 \_\_\_\_\_

41

42

43

44

45

46

1 Sample size 14 Estimated number of participants needed to achieve study objectives and how it was determined, including \_\_\_\_\_ 9,10\_\_\_\_\_

2 clinical and statistical assumptions supporting any sample size calculations

3

4 Recruitment 15 Strategies for achieving adequate participant enrolment to reach target sample size \_\_\_\_\_ 6\_\_\_\_\_

5

6 **Methods: Assignment of interventions (for controlled trials)**

7

8 Allocation:

9

10 Sequence 16a Method of generating the allocation sequence (eg, computer-generated random numbers), and list of any \_\_\_\_\_7\_\_\_\_\_

11 generation factors for stratification. To reduce predictability of a random sequence, details of any planned restriction

12 (eg, blocking) should be provided in a separate document that is unavailable to those who enrol participants

13 or assign interventions

14

15

16 Allocation 16b Mechanism of implementing the allocation sequence (eg, central telephone; sequentially numbered, \_\_\_\_\_7\_\_\_\_\_

17 concealment opaque, sealed envelopes), describing any steps to conceal the sequence until interventions are assigned

18 mechanism

19

20 Implementation 16c Who will generate the allocation sequence, who will enrol participants, and who will assign participants to \_\_\_\_\_7\_\_\_\_\_

21 interventions

22

23

24 Blinding (masking) 17a Who will be blinded after assignment to interventions (eg, trial participants, care providers, outcome \_\_\_\_\_7\_\_\_\_\_

25 assessors, data analysts), and how

26

27 17b If blinded, circumstances under which unblinding is permissible, and procedure for revealing a participant's \_\_\_\_\_7\_\_\_\_\_

28 allocated intervention during the trial

29

30

31 **Methods: Data collection, management, and analysis**

32

33 Data collection 18a Plans for assessment and collection of outcome, baseline, and other trial data, including any related \_\_\_\_\_10\_\_\_\_\_

34 methods processes to promote data quality (eg, duplicate measurements, training of assessors) and a description of

35 study instruments (eg, questionnaires, laboratory tests) along with their reliability and validity, if known.

36 Reference to where data collection forms can be found, if not in the protocol

37

38

39 18b Plans to promote participant retention and complete follow-up, including list of any outcome data to be \_\_\_\_\_10\_\_\_\_\_

40 collected for participants who discontinue or deviate from intervention protocols

41

|    |                                 |     |                                                                                                                                                                                                                                                                                                                                       |                  |
|----|---------------------------------|-----|---------------------------------------------------------------------------------------------------------------------------------------------------------------------------------------------------------------------------------------------------------------------------------------------------------------------------------------|------------------|
| 1  | Data management                 | 19  | Plans for data entry, coding, security, and storage, including any related processes to promote data quality (eg, double data entry; range checks for data values). Reference to where details of data management procedures can be found, if not in the protocol                                                                     | _____ 10_____    |
| 2  |                                 |     |                                                                                                                                                                                                                                                                                                                                       |                  |
| 3  |                                 |     |                                                                                                                                                                                                                                                                                                                                       |                  |
| 4  |                                 |     |                                                                                                                                                                                                                                                                                                                                       |                  |
| 5  | Statistical methods             | 20a | Statistical methods for analysing primary and secondary outcomes. Reference to where other details of the statistical analysis plan can be found, if not in the protocol                                                                                                                                                              | ___ 10,11_____   |
| 6  |                                 |     |                                                                                                                                                                                                                                                                                                                                       |                  |
| 7  |                                 |     |                                                                                                                                                                                                                                                                                                                                       |                  |
| 8  |                                 | 20b | Methods for any additional analyses (eg, subgroup and adjusted analyses)                                                                                                                                                                                                                                                              | ___ 10,11_____   |
| 9  |                                 |     |                                                                                                                                                                                                                                                                                                                                       |                  |
| 10 |                                 | 20c | Definition of analysis population relating to protocol non-adherence (eg, as randomised analysis), and any statistical methods to handle missing data (eg, multiple imputation)                                                                                                                                                       | _____ 10,11_____ |
| 11 |                                 |     |                                                                                                                                                                                                                                                                                                                                       |                  |
| 12 |                                 |     |                                                                                                                                                                                                                                                                                                                                       |                  |
| 13 |                                 |     |                                                                                                                                                                                                                                                                                                                                       |                  |
| 14 | <b>Methods: Monitoring</b>      |     |                                                                                                                                                                                                                                                                                                                                       |                  |
| 15 |                                 |     |                                                                                                                                                                                                                                                                                                                                       |                  |
| 16 | Data monitoring                 | 21a | Composition of data monitoring committee (DMC); summary of its role and reporting structure; statement of whether it is independent from the sponsor and competing interests; and reference to where further details about its charter can be found, if not in the protocol. Alternatively, an explanation of why a DMC is not needed | _____ 10_____    |
| 17 |                                 |     |                                                                                                                                                                                                                                                                                                                                       |                  |
| 18 |                                 |     |                                                                                                                                                                                                                                                                                                                                       |                  |
| 19 |                                 |     |                                                                                                                                                                                                                                                                                                                                       |                  |
| 20 |                                 |     |                                                                                                                                                                                                                                                                                                                                       |                  |
| 21 |                                 |     |                                                                                                                                                                                                                                                                                                                                       |                  |
| 22 |                                 | 21b | Description of any interim analyses and stopping guidelines, including who will have access to these interim results and make the final decision to terminate the trial                                                                                                                                                               | _____ 10_____    |
| 23 |                                 |     |                                                                                                                                                                                                                                                                                                                                       |                  |
| 24 |                                 |     |                                                                                                                                                                                                                                                                                                                                       |                  |
| 25 | Harms                           | 22  | Plans for collecting, assessing, reporting, and managing solicited and spontaneously reported adverse events and other unintended effects of trial interventions or trial conduct                                                                                                                                                     | _____ 9_____     |
| 26 |                                 |     |                                                                                                                                                                                                                                                                                                                                       |                  |
| 27 |                                 |     |                                                                                                                                                                                                                                                                                                                                       |                  |
| 28 | Auditing                        | 23  | Frequency and procedures for auditing trial conduct, if any, and whether the process will be independent from investigators and the sponsor                                                                                                                                                                                           | _____ NA_____    |
| 29 |                                 |     |                                                                                                                                                                                                                                                                                                                                       |                  |
| 30 |                                 |     |                                                                                                                                                                                                                                                                                                                                       |                  |
| 31 |                                 |     |                                                                                                                                                                                                                                                                                                                                       |                  |
| 32 | <b>Ethics and dissemination</b> |     |                                                                                                                                                                                                                                                                                                                                       |                  |
| 33 |                                 |     |                                                                                                                                                                                                                                                                                                                                       |                  |
| 34 | Research ethics approval        | 24  | Plans for seeking research ethics committee/institutional review board (REC/IRB) approval                                                                                                                                                                                                                                             | _____ 6_____     |
| 35 |                                 |     |                                                                                                                                                                                                                                                                                                                                       |                  |
| 36 |                                 |     |                                                                                                                                                                                                                                                                                                                                       |                  |
| 37 | Protocol amendments             | 25  | Plans for communicating important protocol modifications (eg, changes to eligibility criteria, outcomes, analyses) to relevant parties (eg, investigators, REC/IRBs, trial participants, trial registries, journals, regulators)                                                                                                      | _____ 6_____     |
| 38 |                                 |     |                                                                                                                                                                                                                                                                                                                                       |                  |
| 39 |                                 |     |                                                                                                                                                                                                                                                                                                                                       |                  |
| 40 |                                 |     |                                                                                                                                                                                                                                                                                                                                       |                  |
| 41 |                                 |     |                                                                                                                                                                                                                                                                                                                                       |                  |
| 42 |                                 |     |                                                                                                                                                                                                                                                                                                                                       |                  |
| 43 |                                 |     |                                                                                                                                                                                                                                                                                                                                       |                  |
| 44 |                                 |     |                                                                                                                                                                                                                                                                                                                                       |                  |
| 45 |                                 |     |                                                                                                                                                                                                                                                                                                                                       |                  |
| 46 |                                 |     |                                                                                                                                                                                                                                                                                                                                       |                  |

|    |                               |     |                                                                                                                                                                                                                                                                                     |                               |
|----|-------------------------------|-----|-------------------------------------------------------------------------------------------------------------------------------------------------------------------------------------------------------------------------------------------------------------------------------------|-------------------------------|
| 1  | Consent or assent             | 26a | Who will obtain informed consent or assent from potential trial participants or authorised surrogates, and how (see Item 32)                                                                                                                                                        | _____ 6 _____                 |
| 2  |                               |     |                                                                                                                                                                                                                                                                                     |                               |
| 3  |                               |     |                                                                                                                                                                                                                                                                                     |                               |
| 4  |                               | 26b | Additional consent provisions for collection and use of participant data and biological specimens in ancillary studies, if applicable                                                                                                                                               | _____ 6 _____                 |
| 5  |                               |     |                                                                                                                                                                                                                                                                                     |                               |
| 6  |                               |     |                                                                                                                                                                                                                                                                                     |                               |
| 7  | Confidentiality               | 27  | How personal information about potential and enrolled participants will be collected, shared, and maintained in order to protect confidentiality before, during, and after the trial                                                                                                | _____ 10 _____                |
| 8  |                               |     |                                                                                                                                                                                                                                                                                     |                               |
| 9  |                               |     |                                                                                                                                                                                                                                                                                     |                               |
| 10 | Declaration of interests      | 28  | Financial and other competing interests for principal investigators for the overall trial and each study site                                                                                                                                                                       | _____ 13 _____                |
| 11 |                               |     |                                                                                                                                                                                                                                                                                     |                               |
| 12 |                               |     |                                                                                                                                                                                                                                                                                     |                               |
| 13 | Access to data                | 29  | Statement of who will have access to the final trial dataset, and disclosure of contractual agreements that limit such access for investigators                                                                                                                                     | _____ 13 _____                |
| 14 |                               |     |                                                                                                                                                                                                                                                                                     |                               |
| 15 |                               |     |                                                                                                                                                                                                                                                                                     |                               |
| 16 |                               |     |                                                                                                                                                                                                                                                                                     |                               |
| 17 | Ancillary and post-trial care | 30  | Provisions, if any, for ancillary and post-trial care, and for compensation to those who suffer harm from trial participation                                                                                                                                                       | Supplementary file 3<br>_____ |
| 18 |                               |     |                                                                                                                                                                                                                                                                                     |                               |
| 19 |                               |     |                                                                                                                                                                                                                                                                                     |                               |
| 20 | Dissemination policy          | 31a | Plans for investigators and sponsor to communicate trial results to participants, healthcare professionals, the public, and other relevant groups (eg, via publication, reporting in results databases, or other data sharing arrangements), including any publication restrictions | _____ 13 _____                |
| 21 |                               |     |                                                                                                                                                                                                                                                                                     |                               |
| 22 |                               |     |                                                                                                                                                                                                                                                                                     |                               |
| 23 |                               |     |                                                                                                                                                                                                                                                                                     |                               |
| 24 |                               | 31b | Authorship eligibility guidelines and any intended use of professional writers                                                                                                                                                                                                      | _____ 13 _____                |
| 25 |                               |     |                                                                                                                                                                                                                                                                                     |                               |
| 26 |                               | 31c | Plans, if any, for granting public access to the full protocol, participant-level dataset, and statistical code                                                                                                                                                                     | _____ 13 _____                |
| 27 |                               |     |                                                                                                                                                                                                                                                                                     |                               |
| 28 |                               |     |                                                                                                                                                                                                                                                                                     |                               |
| 29 | <b>Appendices</b>             |     |                                                                                                                                                                                                                                                                                     |                               |
| 30 |                               |     |                                                                                                                                                                                                                                                                                     |                               |
| 31 | Informed consent materials    | 32  | Model consent form and other related documentation given to participants and authorised surrogates                                                                                                                                                                                  | Supplementary file 3<br>_____ |
| 32 |                               |     |                                                                                                                                                                                                                                                                                     |                               |
| 33 |                               |     |                                                                                                                                                                                                                                                                                     |                               |
| 34 | Biological specimens          | 33  | Plans for collection, laboratory evaluation, and storage of biological specimens for genetic or molecular analysis in the current trial and for future use in ancillary studies, if applicable                                                                                      | _____ NA _____                |
| 35 |                               |     |                                                                                                                                                                                                                                                                                     |                               |
| 36 |                               |     |                                                                                                                                                                                                                                                                                     |                               |

37 \*It is strongly recommended that this checklist be read in conjunction with the SPIRIT 2013 Explanation & Elaboration for important clarification on the items.  
 38 Amendments to the protocol should be tracked and dated. The SPIRIT checklist is copyrighted by the SPIRIT Group under the Creative Commons  
 39 "[Attribution-NonCommercial-NoDerivs 3.0 Unported](https://creativecommons.org/licenses/by-nc-nd/3.0/)" license.  
 40  
 41  
 42

## Supplementary material 2. The details of hospitals participating in this trial

| <b>Hospital</b>                                          | <b>Province, City</b> | <b>Location in China</b> | <b>Teaching hospital</b> | <b>Grade of hospital</b> |
|----------------------------------------------------------|-----------------------|--------------------------|--------------------------|--------------------------|
| China-Japan Friendship Hospital                          | Beijing               | North                    | Yes                      | Tertiary                 |
| Beijing Luhe Hospital, capital medical University        | Beijing               | North                    | Yes                      | Tertiary                 |
| Daxing Hospital Affiliated to Capital Medical University | Beijing               | North                    | Yes                      | Tertiary                 |
| Qingdao Municipal Hospital                               | Shandong              | East                     | Yes                      | Tertiary                 |
| Linzi district People's hospital                         | Shandong              | East                     | Yes                      | Tertiary                 |
| First Hospital of Shanxi Medical University              | Shanxi                | North                    | Yes                      | Tertiary                 |
| Hebei Provincial General Hospital                        | Hebei                 | North                    | Yes                      | Tertiary                 |
| First Affiliated Hospital of Guangxi Medical University  | Guangxi               | South                    | Yes                      | Tertiary                 |
| Xiangtan Central Hospital                                | Hunan                 | Central                  | Yes                      | Tertiary                 |
| First Affiliated Hospital of Wenzhou Medical University  | Zhejiang              | East                     | Yes                      | Tertiary                 |

Definition of Secondary and Tertiary hospital in China: The Secondary hospital is defined as a hospital providing medical, prevention, health care and rehabilitation services to multiple communities (with a radius of population more than 100,000 peoples); the Tertiary hospital is defined as a hospital providing medical service to the whole country beyond cities and provinces, with comprehensive medical, teaching and research ability.

## Informed Consent Form · Notice for Participants

Dear Mr/Ms \_\_\_\_\_:

You (/ your family) are currently hospitalized with acute exacerbation of chronic obstructive pulmonary disease (AECOPD). You are invited to attend a clinical study of AECOPD. Please read the following information as carefully as possible before you decide whether or not to participate in this study. It will help you understand the value and significance, the procedures and duration, as well as the possible benefits, discomfort and risks of participating in this study. If you want, you can also discuss it with your relatives, friends, or consult your doctor to help you make the decision. If you have any question, please do not hesitate to contact the doctor.

### 1. Background and objective

#### 1.1 Background

Chronic obstructive pulmonary disease (COPD) is currently the fourth leading cause of death in the world, but is projected to be the third by 2020. Acute exacerbations are the most common reason for hospitalization and death for patients with COPD. Not all patients with AECOPD would benefit from antibiotic therapy. Antibiotics overuse wastes medical resources, drives antimicrobial resistance, may cause side effects, negatively affects the microbiome of patients, and distracts from potentially more effective interventions. The GOLD guidelines have been recommended antibiotics prescription in patients of Anthonisen I and II with sputum purulence, as well as patients with mechanical ventilation, which has potential risk in overuse of antibiotics. Procalcitonin (PCT), a reliable biomarker of bacterial infection, has the potential to guide the prescription of antibiotics. In order to evaluate the efficacy of PCT to guide antibiotic management in patients with AECOPD, we aim to perform this multicenter, blind, randomized, controlled clinical trial.

#### 1.2 Objective

This study aim to determine whether PCT-guided antibiotic therapy will reduce the antibiotic prescription rate for AECOPD without negatively impacting the treatment success rate, compared with the GOLD guideline recommendations.

## 2. Research method

This study has been approved by the Medical Ethics Committee of China-Japan Friendship Hospital. This is a multicenter, randomized, controlled clinical trial which will be conducted in 10 tertiary general hospitals including China-Japan Friendship Hospital, and plans to recruit 500 eligible hospitalized patients with AECOPD to participate voluntarily.

Eligible participants will be randomly assigned to either the PCT-guided antibiotic therapy (PCT group) or the GOLD guideline antibiotic recommendations (guideline group) in a ratio of 1:1. The selection of different groups will not affect the routine treatment for you.

This study will record your personal and disease-related information, including medical history (such as vital signs), routine medical and laboratory examination results. In order to objectively evaluate the changes of your condition, you will be inquired in varying time points (screening period, day1, day 3, day 14 and day 30 after randomization) and the changes will be recorded. The follow-up will continue until day 30 after randomization.

The above routine treatment and medical examinations are all necessary for the clinical treatment of patients with AECOPD. This study does not involve any special examinations or treatment, nor add extra burden on patients.

## 3. Participants' Responsibility

During the study period, you (/your family) are required to follow the study protocol and undergoing the follow-up by your investigators about your (/your family) outcome.

## 4. Participants' Right

You (/your family) are voluntary to participate in this study. You should not feel any pressure to participate. You have the rights to refuse to attend this study, or at any time inform the investigator to request withdrawal from the study without any discrimination or retaliation. Your data will not be included in the study and any medical treatment. Your benefits will not be affected.

You can keep track of the information and progress of this research. If you have any questions about the study, or if you feel any discomfort during the research, or if the



study involves your rights, you can always consult the investigators. If you have any complaints, please contact the ethics committee of your hospital.

### **5. The possible benefits during the study**

You, people and society will probably benefit from this study, such as the potential avoidance of antibiotics use, and it may be helpful for other patients with similar condition. Treatment and related medical examinations will be performed according to the routine protocol of GOLD guideline regardless of your participation in this study. Investigators will follow up your health condition until day 30 after randomization, regardless you stay in hospital or not, and give you careful guidance.

### **6. The possible risks during the study**

The routine therapy for AECOPD is based on the GOLD guideline. A previous study has shown that recommending not antibiotic therapy for patients with PCT level less than 0.1ng/ml do not occur adverse outcome. If any adverse event occurs in this study, the Medical Experts Committee will identify whether it is related to the study. If the damage is related to the study, the cost of treatment and relevant economic compensation will be provided according to the provisions of China's "Good Clinical Practice (GCP).

### **7. Participants personal privacy protection**

If you (/your family) decide to participate in the study, your personal data in the study are confidential. In all medical records of this study, your name will be replaced by a Pinyin abbreviation. Your medical records and information will be kept in the hospital, only the investigator, research authority department, and ethics committee will be approved to access them. Any public report about the results of this study will not disclose your personal identity.

You (/your family) can choose not to attend this study, or to withdraw at any time without any discrimination or retaliation, and your medical treatment and benefits will not be affected.

Your (/your family's) participation in this study is voluntary. You (/your family) can keep track of the relevant information. If you have any questions related to this research,

1  
2  
3  
4 or you have a research-related injury, or have questions about the Participants' rights  
5 and interests, you can contact the investigator any time.  
6

7 In the case of an emergency, please contact the investigator:  
8

9 Contact phone number:  
10  
11  
12  
13  
14  
15  
16  
17  
18  
19  
20  
21  
22  
23  
24  
25  
26  
27  
28  
29  
30  
31  
32  
33  
34  
35  
36  
37  
38  
39  
40  
41  
42  
43  
44  
45  
46  
47  
48  
49  
50  
51  
52  
53  
54  
55  
56  
57  
58  
59  
60

For peer review only

## Participants' informed consent form

I have read the introduction of this trial and have the opportunity to discuss and ask questions with my doctor about this trial. All my questions were answered satisfactorily. I know the risks and benefits of participating in this trial, and I understand that participating in this trial is voluntary. I inquired about the details of the trial and all the relevant questions were answered. At the same time, my family and I have plenty of time to consider, but also a clear understanding of the following:

1. I can consult my doctor for more information at any time.
2. All my personal information is confidential; my privacy and right to know will be kept confidential.
3. I can withdraw from this trial at any time without discrimination or retaliation, and medical treatment will not be affected.
4. I agree that investigators, research authorities and ethics committees should consult my medical records after approval.
5. I will get a signed and dated copy of the informed consent.

I decided to agree to participate in this trial and try to comply with the doctor's advice.

Participant or legal representative signature:

Signature date:

Contact phone number:

The relationship between the signer and the subject:

I confirm that I have accurately explained to the subject the details of the trial, including its rights, possible benefits and risks, and answered all questions.

The participant volunteered to participate in the trial and had given a signed copy of the informed consent.

Investigator signature:

Signature date:

Contact phone number:

# BMJ Open

## Procalcitonin-guided initiation of antibiotics in AECOPD inpatients: study protocol for a multicenter randomized controlled trial

|                                 |                                                                                                                                                                                                                                                                                                                                                                                                                                                                                                                                                                                                                                                   |
|---------------------------------|---------------------------------------------------------------------------------------------------------------------------------------------------------------------------------------------------------------------------------------------------------------------------------------------------------------------------------------------------------------------------------------------------------------------------------------------------------------------------------------------------------------------------------------------------------------------------------------------------------------------------------------------------|
| Journal:                        | <i>BMJ Open</i>                                                                                                                                                                                                                                                                                                                                                                                                                                                                                                                                                                                                                                   |
| Manuscript ID                   | bmjopen-2021-049515.R1                                                                                                                                                                                                                                                                                                                                                                                                                                                                                                                                                                                                                            |
| Article Type:                   | Protocol                                                                                                                                                                                                                                                                                                                                                                                                                                                                                                                                                                                                                                          |
| Date Submitted by the Author:   | 22-Jun-2021                                                                                                                                                                                                                                                                                                                                                                                                                                                                                                                                                                                                                                       |
| Complete List of Authors:       | Huang, Lixue; Capital Medical University; China-Japan Friendship Hospital<br>Wang, Jinxiang; Capital Medical University, respiratory and critical care medicine, BeijingnnLuhe Hospital<br>Gu, Xiaoying<br>Sheng, Weili; Department of Pulmonary and Critical Care Medicine<br>Wang, Yeming; Capital Medical University, Department of Pulmonary and Critical Care Medicine; China-Japan Friendship Hospital, Department of Pulmonary and Critical Care Medicine<br>Bin, Cao; Capital Medical University, Department of Pulmonary and Critical Care Medicine; China-Japan Friendship Hospital, Department of Pulmonary and Critical Care Medicine |
| <b>Primary Subject Heading</b>: | Respiratory medicine                                                                                                                                                                                                                                                                                                                                                                                                                                                                                                                                                                                                                              |
| Secondary Subject Heading:      | Respiratory medicine, Public health                                                                                                                                                                                                                                                                                                                                                                                                                                                                                                                                                                                                               |
| Keywords:                       | Protocols & guidelines < HEALTH SERVICES ADMINISTRATION & MANAGEMENT, Thoracic medicine < INTERNAL MEDICINE, PRIMARY CARE, Clinical trials < THERAPEUTICS                                                                                                                                                                                                                                                                                                                                                                                                                                                                                         |
|                                 |                                                                                                                                                                                                                                                                                                                                                                                                                                                                                                                                                                                                                                                   |

SCHOLARONE™  
Manuscripts



I, the Submitting Author has the right to grant and does grant on behalf of all authors of the Work (as defined in the below author licence), an exclusive licence and/or a non-exclusive licence for contributions from authors who are: i) UK Crown employees; ii) where BMJ has agreed a CC-BY licence shall apply, and/or iii) in accordance with the terms applicable for US Federal Government officers or employees acting as part of their official duties; on a worldwide, perpetual, irrevocable, royalty-free basis to BMJ Publishing Group Ltd ("BMJ") its licensees and where the relevant Journal is co-owned by BMJ to the co-owners of the Journal, to publish the Work in this journal and any other BMJ products and to exploit all rights, as set out in our [licence](#).

The Submitting Author accepts and understands that any supply made under these terms is made by BMJ to the Submitting Author unless you are acting as an employee on behalf of your employer or a postgraduate student of an affiliated institution which is paying any applicable article publishing charge ("APC") for Open Access articles. Where the Submitting Author wishes to make the Work available on an Open Access basis (and intends to pay the relevant APC), the terms of reuse of such Open Access shall be governed by a Creative Commons licence – details of these licences and which [Creative Commons](#) licence will apply to this Work are set out in our licence referred to above.

Other than as permitted in any relevant BMJ Author's Self Archiving Policies, I confirm this Work has not been accepted for publication elsewhere, is not being considered for publication elsewhere and does not duplicate material already published. I confirm all authors consent to publication of this Work and authorise the granting of this licence.



1  
2  
3  
4 25 **Abstract**

5 26 **Introduction:** Current antibiotic prescription for acute exacerbation of chronic  
6 obstructive pulmonary disease (AECOPD) is generally based on the Anthonisen criteria  
7 in The Global Initiative for Chronic Obstructive Pulmonary Disease (GOLD) guideline,  
8 that has a potential risk of antibiotics overuse. The dilemma is to identify patients who  
9 are most likely to benefit from antibiotics while avoiding unnecessary antibiotic use.  
10 Procalcitonin (PCT), a more sensitive and specific biomarker of bacterial infection than  
11 other conventional laboratory tests, has the potential to determine those patients in  
12 whom antibiotics would be beneficial. It is unclear whether PCT-guided antibiotic  
13 therapy is safe and effective for patients hospitalized with AECOPD. The study  
14 hypothesis is that PCT-guided antibiotic therapy could reduce the antibiotic  
15 prescription rate for AECOPD, compared with the GOLD guideline recommendations,  
16 without negatively impacting the treatment success rate.  
17  
18  
19  
20  
21  
22  
23  
24  
25  
26  
27  
28

29 38 **Methods and analysis:** In this multicenter, open-label, randomized controlled trial, we  
30 aim to enroll 500 hospitalized patients with AECOPD, that will be randomly assigned  
31 to either a PCT-guided group or a GOLD guideline-guided group. The co-primary  
32 endpoints are antibiotic prescription rate for AECOPD within 30 days post  
33 randomization and treatment success rate at day 30 post randomization. The secondary  
34 outcomes include: antibiotic prescription rate at day 1 post randomization; hospital  
35 antibiotic exposure; length of hospital stay; rate of subsequent exacerbation and  
36 hospital readmission; overall mortality within 30 days post randomization; changes in  
37 lung function and the score of COPD assessment test and modified Medical Research  
38 Council (mMRC); and rate of intensive care unit admission.  
39  
40  
41  
42  
43  
44  
45  
46  
47

48 48 **Ethics and dissemination:** This trial has been approved by the ethic committee of  
49 China-Japan Friendship Hospital. The findings of the study will be disseminated in  
50 peer-reviewed journals. If the results of the study are positive, PCT-guided antibiotic  
51 therapy is likely to change the guidelines for antibiotic recommendations for patients  
52 with AECOPD.  
53  
54  
55  
56  
57

58 53 **Trial registration number :** ClinicalTrials.gov: NCT04682899  
59  
60

1  
2  
3  
4 55 **Strengths and limitations of this study**

- 5  
6 56 ➤ This is a nationwide, multicenter, randomized controlled trial in China.  
7  
8 57 ➤ The study design conclude two primary outcomes regarding safety and effectivity.  
9  
10 58 ➤ The study encompasses multiple clinically related secondary outcomes.  
11  
12 59 ➤ The study has a sample size large enough to provide high-quality evidence to  
13  
14 60 evaluate the safety and effectivity of PCT in patients with AECOPD.  
15  
16 61 ➤ One limitation of the study is that patients, primary clinicians and laboratory staff  
17  
18 62 are clear to the grouping, only outcomes assessor and statisticians are blinded.  
19  
20  
21  
22  
23  
24  
25  
26  
27  
28  
29  
30  
31  
32  
33  
34  
35  
36  
37  
38  
39  
40  
41  
42  
43  
44  
45  
46  
47  
48  
49  
50  
51  
52  
53  
54  
55  
56  
57  
58  
59  
60



## 63 **Introduction**

64 Chronic obstructive pulmonary disease (COPD) is currently the fourth leading cause of  
65 death in the world, but is projected to be the third by 2020<sup>1</sup>. In China, COPD is the third  
66 leading cause of death<sup>2</sup> and the overall prevalence in adults aged 40 years or older has  
67 risen from 8.2% (during 2002-04)<sup>3</sup> to 13.7% (during 2012-15)<sup>4</sup>. Acute exacerbations  
68 are the most common reason for hospitalization and death for patients with COPD. The  
69 Global Initiative for Chronic Obstructive Pulmonary Disease (GOLD) guideline notes  
70 that exacerbations of COPD are mainly triggered by respiratory viral infections,<sup>5</sup>  
71 however, a very high proportion of patients with acute exacerbation of COPD  
72 (AECOPD) received antibiotic treatment. The prescription rate of antibiotics for  
73 inpatients with AECOPD in the United States, Europe, and China all exceeds 85%<sup>6-8</sup>.  
74 This brings a high risk of unnecessary use of antibiotics. Antibiotics overuse wastes  
75 medical resources, drives antimicrobial resistance, may cause side effects, negatively  
76 affects the microbiome of patients, and distracts from potentially more effective  
77 interventions<sup>9</sup>.

78 The current GOLD guidelines recommended antibiotics prescription in patients of  
79 Anthonisen I and II<sup>10</sup> with sputum purulence, as well as patients with mechanical  
80 ventilation.<sup>11</sup> The GOLD guidelines assume purulence of sputum indicates bacterial  
81 infection, however, previous trials have shown it was not a reliable marker for bacterial  
82 presence<sup>12,13</sup>. On the basis of guideline recommendations, antibiotic prescription should  
83 be implemented on all patients with AECOPD receiving mechanical ventilation. This  
84 can obviously lead to overuse of antibiotics, particularly in those with acute  
85 exacerbation driven by viral infection or environmental factors. Thus, wide  
86 implementation of the antibiotic recommendations from the GOLD guidelines have the  
87 potential risk of antibiotic overuse.

88 Identifying AECOPD driven by bacterial infection is necessary prior to antibiotics  
89 prescription. Procalcitonin (PCT), a reliable biomarker of bacterial infection, has the  
90 potential to guide the prescription of antibiotics. Several randomized controlled trials

1  
2  
3  
4 91 (RCTs) have explored the effect of PCT on guiding antibiotic therapy in patients with  
5  
6 92 lower respiratory infections<sup>14-16</sup> and especially patients with AECOPD<sup>17</sup>. Given the  
7  
8 93 limitations of these studies, whether PCT-guided antibiotic therapy will safely and  
9  
10 94 effectively bring clinical benefit for AECOPD was unclear. PCT guidance, markedly  
11  
12 95 and safely, reduced antibiotic prescriptions or the duration of antibiotic therapy in  
13  
14 96 patients with lower respiratory infections<sup>14-16</sup>. However, enrolled patients were not  
15  
16 97 restricted to patients with COPD, but also included patients with community acquired  
17  
18 98 pneumonia, asthma and bronchitis. A RCT study of 208 inpatients with AECOPD  
19  
20 99 showed that PCT guidance resulted in reduced antibiotic prescription and exposure  
21  
22 100 compared to standard care therapy, with no difference in secondary outcomes  
23  
24 101 (including success rate, subsequent exacerbation and rehospitalization rates) between  
25  
26 102 the two groups.<sup>17</sup> However, the sample size was calculated according to a single  
27  
28 103 outcome of antibiotic prescription rate and this limited sample size (208 AECOPD  
29  
30 104 inpatients) was insufficiently powered to show whether PCT-guided algorithms do not  
31  
32 105 affect secondary outcomes. Due to the lack of confirmatory PCT trials with rigorous  
33  
34 106 methodology for COPD, the current GOLD guideline still recommend antibiotic  
35  
36 107 prescription according to the Anthonisen criteria of 1987<sup>10</sup>.

37  
38 108 Evidence from our previous study has shown that patients with AECOPD and with a  
39  
40 109 PCT level less than 0.1 ng/ml did not benefit from the additional antibiotic therapy.<sup>18</sup>  
41  
42 110 In this protocol, we aim to conduct a multicenter RCT to determine the effect of PCT-  
43  
44 111 guided antibiotic therapy compared to the current GOLD guideline recommendations  
45  
46 112 in patients with AECOPD.

## 47 48 49 113 **Methods/design**

### 50 51 52 114 **Objective**

53  
54  
55 115 The primary aim is to determine whether PCT-guided antibiotic therapy will reduce the  
56  
57 116 antibiotic prescription rate for AECOPD without negatively impacting the treatment  
58  
59 117 success rate, compared with the GOLD guideline recommendations.  
60

## 118 **Design**

119 This is a nationwide, multicenter, open-label, RCT that will be conducted at 10  
120 hospitals in China. Eligible participants will be randomly assigned to either the PCT-  
121 guided antibiotic therapy (PCT group) or the GOLD guideline antibiotic  
122 recommendations (guideline group) in a ratio of 1:1. Figure 1 shows the flow chart of  
123 the trial. We will address this question in terms of co-primary outcome measures:  
124 antibiotic prescription rate for AECOPD within 30 days post randomization and the  
125 treatment success rate at day 30 post randomization. Between-group differences in  
126 antibiotic prescription rates will be investigated for superiority, while differences in  
127 treatment success rates for non-inferiority. The study design follows the Standard  
128 Protocol Items: Recommendations for Interventional Trials statement  
129 recommendations.<sup>19</sup> The items from the trial registration data set are recorded in the  
130 online supplementary material 1.

131

## 132 **Population and eligibility criteria**

133 Recruitment will be conducted at the department of the pulmonary and critical care  
134 medicine of the 10 tertiary teaching hospitals in China. The detailed information of  
135 these hospitals are shown in online supplementary material 2. The inclusion criteria and  
136 exclusion criteria are shown in Table 1. In the context of preventing and controlling  
137 COVID-19 pandemic, wearing a mask in whole people in China increase the difficulty  
138 of recruitment of eligible patients with AECOPD. According to the current recruitment  
139 speed, approximately 30 patients were enrolled into the study every month in 10 centers.  
140 We estimate that recruitment duration will last until April 2022.

141

## 142 **Ethics and informed consent**

143 The Ethics Committee of China-Japan Friendship Hospital has approved the trial (file  
144 number: 2020-87-K51). Written informed consent (online supplementary material 3)  
145 will be required from eligible patients at each participating centers, or their legal  
146 representative if they were unable to provide consent.

147

## 148 **Randomization and allocation concealment**

149 Eligible patients will be randomly assigned (1:1) to either the PCT group or the  
150 guideline group within 24 hours after hospitalization. The random sequence was  
151 generated by a statistician using SAS software, version 9.4 and stored by a manager  
152 from the China-Japan friendship hospital, both of them are not involved in the trial.  
153 Once an eligible participant is recruited in each center, the site investigator will request  
154 a random number by telephone from the manager. The investigator receive the group  
155 information based on the random number, and then conducted next step according to  
156 trial protocol. The participants, health care providers and laboratory staff are known to  
157 the patient allocation. Outcomes assessors and statisticians will be blinded to the study  
158 assignment.

## 160 **Interventions**

161 Participants in the PCT group will complete a PCT test within 2 hours after  
162 randomization and the results will be sent back to the clinician by laboratory through  
163 the internal network of the hospital. The prescribing clinician will use the results of the  
164 PCT to help guide their antibiotic prescription decision. Participants in the guideline  
165 group will also need to complete a PCT test within 2 hours after randomization,  
166 however, the laboratory will save the results and do not sent back to the clinician. The  
167 detailed antibiotic recommendations of both groups are shown in Table 2. Other  
168 therapies for AECOPD in both groups will be based on the GOLD guideline  
169 recommended standard care. All participating centers will be provided the 2020 version  
170 of the GOLD guideline.

171 To ensure the veracity and reliability of results, each center may adopt any one of  
172 the following three validated assays to measure the value of PCT: B·R·A·H·M·S PCT  
173 sensitive KRYPTOR assay (Thermo Fisher Scientific, Hennigsdorf, Germany), Roche  
174 Elecsys B·R·A·H·M·S PCT assay, or the BioMérieux's Vidas B·R·A·H·M·S PCT  
175 assay. The direct measuring range of B·R·A·H·M·S PCT sensitive KRYPTOR assay  
176 is from 0.02-50 ng/ml, and the Functional Assay Sensitivity (FAS) is 0.06 ng/ml, which  
177 is 3-fold to 10-fold above normal mean values.<sup>17,20</sup> The direct measuring range of Roche

1  
2  
3  
4 178 Elecsys B·R·A·H·M·S PCT assay is from 0.02-100 ng/ml, and the FAS is 0.06 ng/ml.<sup>20</sup>  
5  
6 179 The direct of measuring range of BioMérieux's Vidas B·R·A·H·M·S PCT assay is  
7  
8 180 0.05-200 ng/ml, and the FAS is 0.09 ng/ml.<sup>20</sup> Each center will perform standard  
9  
10 181 calibration procedures on the instruments and analyze two levels of quality control  
11  
12 182 materials with each sample run. Procedure time for all these assays is less than 30  
13  
14 183 minutes. Each participating center will have access to a Kryptor machine, a suitable  
15  
16 184 Vidas or Roche immunoanalyser to expedite the sample analysis and rapidly provide  
17  
18 185 PCT results for guidance in the protocol.

## 19 186 **Outcomes**

### 20 187 Primary endpoints

- 21 188 - Antibiotic prescription rate within 30 days post randomization, expressed as the  
22 189 proportion of patients receiving antibiotics for AECOPD. The objective of  
23 190 antibiotic prescription is to treat AECOPD during hospitalization or after discharge;  
24 191 antibiotics used for other reasons are excluded, such as new urinary tract infection.
- 25 192 - Treatment success rate at day 30 post randomization. Treatment success is defined  
26 193 as cure (a complete resolution of signs and symptoms associated with the  
27 194 exacerbation) or improvement (a resolution or reduction of the symptoms and signs  
28 195 associated with the exacerbation, without new symptoms or signs).<sup>21</sup> Treatment  
29 196 failure is defined as absence of resolution of symptoms and signs; worsening of  
30 197 symptoms and signs; occurrence of new symptoms and signs associated with the  
31 198 primary or with a new infection; or death of any reason after randomization.<sup>21</sup> Face  
32 199 to face consult will be performed on day 30 post randomization.

### 33 200 34 201 Secondary endpoints

- 35 202 - Antibiotic prescription rate at day 1 post randomization
- 36 203 - Hospital antibiotic exposure, expressed as the number of days of antibiotic  
37 204 consumed for AECOPD and the proportion of patients receiving antibiotic for  
38 205 AECOPD during hospitalization
- 39 206 - Length of hospital stay, expressed as the number of days of hospitalization
- 40 207 - Rate of subsequent exacerbation, hospital readmission and overall mortality within

- 1  
2  
3  
4 208 30 days post randomization  
5  
6 209 - Change in lung function, COPD assessment test (CAT)<sup>22</sup> and modified Medical  
7  
8 210 Research Council (mMRC) dyspnea scale<sup>23</sup>, expressed as the difference between  
9  
10 211 the baseline of hospital admission and day 30 post randomization.  
11  
12 212 - ICU admission rate  
13  
14 213

#### 15 214 **Follow-up**

16  
17  
18 215 The total follow-up period is 30 days post randomization. The follow-up items at  
19  
20 216 multiple time points are shown in Table 3. Notably, we will contact all the eligible  
21  
22 217 participants and ask them to participate a face-to-face interview at each participating  
23  
24 218 center on the day 30 post randomization.  
25

#### 26 27 219 **Adverse events**

28  
29 220 Choice and duration of antibiotics and other pharmacological treatments including  
30  
31 221 bronchodilators and glucocorticoids in both groups are all based on current guideline  
32  
33 222 recommendations. Study intervention will not change the daily clinical treatment  
34  
35 223 therapy, and consequently will not increase the risk of adverse events. Adverse events  
36  
37 224 will be collected and reported as part of routine follow-up. All events fulfilling the  
38  
39 225 definition of a serious adverse event (SAE), including death, that occur during research  
40  
41 226 period will be reported to the research center expert committee within 24 h post event  
42  
43 227 occurrence.  
44

#### 45 46 228 **Sample size**

47  
48  
49 229 This study is designed to have sufficient power to detect a 20% reduction from an  
50  
51 230 estimated 70% that consume antibiotics for the AECOPD during the 30 days following  
52  
53 231 randomization. In the Schuetz's RCT to compare PCT guide antibiotic prescription with  
54  
55 232 guideline therapy, subgroup analysis in patients with AECOPD shown that the 30 days  
56  
57 233 prescription rate of guideline group and procalcitonin group was 69.9% and 48.7%,  
58  
59 234 respectively<sup>16</sup>. Detecting a difference in proportions between 0.70 and 0.50 at the 5%  
60

1  
2  
3  
4 235 significance level with 90% power requires a total 242 participants. Assuming a drop-  
5  
6 236 out rate of 20%, we will need to enroll 302 participants. In addition, we aim to have  
7  
8 237 sufficient power to demonstrate that participants managed with PCT-guided strategy  
9  
10 238 are non-inferior, compared to those managed with guideline recommendations, in terms  
11  
12 239 of treatment success rate at day 30 post randomization. A limited number of studies  
13  
14 240 have reported the success rate at day 30 after randomization in patients with  
15  
16 241 AECOPD<sup>17,24</sup>. According to prior trials in terms of hospitalized patients with AECOPD,  
17  
18 242 Stolz<sup>17</sup> reported the short-term treatment success rate as 83.9% (from 14 to 21 days post  
19  
20 243 randomization) and Prins<sup>24</sup> determined the treatment failure rate at day 30 after  
21  
22 244 randomization as 20.3%. Based on these data and assuming a treatment success rate of  
23  
24 245 0.8 at day 30 following randomization, a non-inferior margin of 0.1<sup>25</sup>, based on a one-  
25  
26 246 sided significance level of 0.05 and 80% power, would require 396 participants. Again  
27  
28 247 with a drop-out rate of 20%, 495 participants will need to be included. Finally,  
29  
30 248 considering these two primary endpoints, we will aim to recruit 500 participants in total  
31  
32 249 to the study.

33 250

### 35 251 **Data collection and management**

36 252 An independent clinician from each center, unknown the group information, will collect  
37  
38 253 the data through a prespecified case report form (CRF) at multiple time points. The data  
39  
40 254 filled in the CRF should be accurate, complete, timely and reliable. All centers in our  
41  
42 255 study are qualified by the 'Good Clinical Practice (GCP) training' of the State Food  
43  
44 256 and Drug Administration for compliance in the training. To increase study awareness  
45  
46 257 and protocol adherence, we will convene principle investigator in each center and  
47  
48 258 organize a face-to-face meeting to discuss the study protocol before study initiation.  
49  
50 259 Two experienced data managers from the China-Japan hospital biweekly check the  
51  
52 260 CRF of each center, track clinicians' antibiotic prescription decisions in both groups  
53  
54 261 and assess adherence to the protocol. They will ask investigators to resolve any queries  
55  
56 262 identified, record the reasons for non-adherence and provide regular feedback to every  
57  
58 263 center. To solve the potential problems and grantee the quality of research, principle  
59  
60 264 investigator at each center will gather and conduct an online meeting every month. All



1  
2  
3  
4 265 randomized patients should be followed up until 30 days post randomization.

5  
6 266 **Data analysis**

7  
8  
9 267 Participants' characteristics and clinical measures will be described by frequencies and  
10  
11 268 percentages, means and standard deviations, or medians and interquartile ranges as  
12  
13 269 appropriate. There will be no planned interim analysis. All analysis will be based on  
14  
15 270 the ITT population, including all randomized participants. Missing data was considered  
16  
17 271 using multiple imputation. All analyses will be completed using SAS, version 9.4 (SAS  
18  
19 272 Institute).

20  
21  
22 273 **Primary analysis**

- 23  
24 274 - The first primary analysis will aim to compare the rate of antibiotic prescription  
25  
26 275 within 30 days between PCT group and guideline group. A two-sided 95%-  
27  
28 276 confidence interval will be computed for the difference in antibiotic prescription  
29  
30 277 rate for both arms.
- 31  
32 278 - The second primary analysis will compare the difference in proportions of clinical  
33  
34 279 treatment success at day 30 between both groups, relative to a 10% non-inferiority  
35  
36 280 margin, and construct a two-sided 90% confidence interval for the difference in  
37  
38 281 proportions. Non-inferiority will be declared if the lower limit of the confidence  
39  
40 282 interval exceeds -10%.

41 283

42  
43 284 **Secondary analysis**

44  
45 285 Secondary outcomes will be analyzed in a similar manner to the primary outcomes,  
46  
47 286 with linear, logistic, and Poisson regression models fitted as appropriate. All tests will  
48  
49 287 be two-sided, with  $p$  value less than 0.05 deemed statistically significant.

50  
51 288

52  
53 289 **Patient and public involvement**

54  
55 290 No patients or public involved in the present study. The results of this study will be  
56  
57 291 published by the investigators in relevant scientific peer-reviewed journals, no matter  
58  
59 292 the study findings.



293

**294 Ethics and dissemination**

295 This trial has been approved by the ethic committee of China-Japan Friendship Hospital  
296 (file number: 2020-87-K51). The findings of the study will be published by the  
297 investigators in relevant scientific peer-reviewed journals. Once published, the data in  
298 our study will be available to other researchers upon reasonable request and with the  
299 permission of researcher committee.

300

**301 Discussion**

302 AECOPD are important events in the management of COPD because they negatively  
303 impact health status, rates of hospitalization and readmission, and disease progression.  
304 Over 85% of patients presenting with AECOPD have been prescribed antibiotics in the  
305 USA<sup>6</sup> and Europe<sup>7</sup>. However, not all acute exacerbations are driven by bacteria  
306 infection, viral infections and environmental factors are currently main predisposing  
307 factors. Current antibiotic prescribing is generally based on the criteria outlined by  
308 Anthonisen and colleagues in 1987<sup>10</sup> that includes increased dyspnea, increased sputum  
309 volume and increased sputum purulence. The GOLD guideline recommends the use of  
310 antibiotics in patients who have all three criteria or, in patients who have two criteria  
311 when sputum purulence is one of them, or in patients who require mechanical  
312 ventilation. However, whether antibiotic therapy according to Anthonisen criteria will  
313 benefit patients is unclear. Some randomized trials have found that only patients with  
314 increased sputum purulence benefit from antibiotic therapy with amoxicillin–  
315 clavulanate, regardless of the presence or absence of the other two criteria<sup>26,27</sup>. In  
316 another randomized trial, doxycycline was not superior to placebo in any Anthonisen  
317 criteria–defined subgroup, including among patients with purulent sputum.<sup>28</sup> Thus,  
318 Anthonisen criteria have insufficient diagnostic accuracy to predict which patients can  
319 safely be managed without antibiotics.

320 The dilemma is to identify patients who are most likely to benefit from antibiotics while  
321 avoiding unnecessary antibiotic use. Procalcitonin, a biomarker of bacterial infection

1  
2  
3  
4 322 with higher sensitivity and specificity than conventional laboratory tests<sup>29-31</sup>, would  
5  
6 323 have the potential to distinguish patients in whom antibiotics would be beneficial and  
7  
8 324 guide their duration of use. Due to the small study populations and multiple subgroups  
9  
10 325 analysis of lower respiratory tract infection in previous studies<sup>14-17</sup>, it is unclear whether  
11  
12 326 PCT-guided antibiotic therapy is safe and effective for patients with AECOPD. PCT-  
13  
14 327 based protocols may be clinically effective; however, confirmatory trials with rigorous  
15  
16 328 methodology are still required<sup>32</sup>.

17  
18 329 In our trial, we aim to evaluate whether PCT-guided antibiotic therapy will reduce the  
19  
20 330 antibiotic prescription rate for patients with AECOPD, in comparison to the GOLD  
21  
22 331 guideline recommendations, without negatively impacting the treatment success rate.  
23  
24 332 If the results of the study are positive (i.e. a significant reduction in antibiotic  
25  
26 333 prescribing with no evidence of significant impairment in the treatment success rate),  
27  
28 334 PCT-guided antibiotic therapy is likely to change the guidelines for antibiotic  
29  
30 335 recommendations for patients with AECOPD.

31  
32  
33 336 **Contributors** BC, JW and LH conceived and designed the study. YW and WS  
34  
35 337 provided suggestions for the study design. XG performed the sample size calculation.  
36  
37 338 LH and JW drafted and edited the manuscript. All authors have contributed to the  
38  
39 339 revision of the draft and have read and approved the final version.

40  
41  
42 340 **Funding** This study was supported by Chinese Academy of Medical Sciences  
43  
44 341 Innovation Fund for Medical Sciences (CIFMS 2018-I2M-1-003 and 2020-I2M-  
45  
46 342 CoV19-005).

47  
48  
49 343 **Disclaimer** The funder had no role in the design of the protocol, the conduction of the  
50  
51 344 trial, or the analyses or reporting of the data.

52  
53  
54 345 **Competing interests** None declared.

55  
56  
57 346 **Patient consent for publication** Not required  
58  
59  
60

## References

1. Lozano R, Naghavi M, Foreman K, et al. Global and regional mortality from 235 causes of death for 20 age groups in 1990 and 2010: a systematic analysis for the Global Burden of Disease Study 2010. *Lancet*. 2012;380(9859):2095-2128.
2. Zhou M, Wang H, Zhu J, et al. Cause-specific mortality for 240 causes in China during 1990-2013: a systematic subnational analysis for the Global Burden of Disease Study 2013. *Lancet*. 2016;387(10015):251-272.
3. Zhong N, Wang C, Yao W, et al. Prevalence of chronic obstructive pulmonary disease in China: a large, population-based survey. *Am J Respir Crit Care Med*. 2007;176(8):753-760.
4. Wang C, Xu J, Yang L, et al. Prevalence and risk factors of chronic obstructive pulmonary disease in China (the China Pulmonary Health [CPH] study): a national cross-sectional study. *Lancet*. 2018;391(10131):1706-1717.
5. Global Initiative for Chronic Obstructive Lung Disease. Global strategy for the diagnosis, management, and prevention of chronic obstructive pulmonary disease. GOLD, 2020, ([http:// www.goldcopd.org](http://www.goldcopd.org)).
6. Lindenauer PK, Pekow P, Gao S, Crawford AS, Gutierrez B, Benjamin EM. Quality of care for patients hospitalized for acute exacerbations of chronic obstructive pulmonary disease. *Ann Intern Med*. 2006;144(12):894-903.
7. Lopez-Campos JL, Hartl S, Pozo-Rodriguez F, Roberts CM, European CAT. Antibiotic Prescription for COPD Exacerbations Admitted to Hospital: European COPD Audit. *PLoS One*. 2015;10(4):e0124374.
8. Ma Y, Huang K, Liang C, et al. Real-world antibiotic use in treating acute exacerbations of chronic obstructive pulmonary disease (AECOPD) in China: Evidence from the ACURE study. *Front Pharmacol*. 2021;12:649884.
9. Butler CC, Gillespie D, White P, et al. C-Reactive Protein Testing to Guide Antibiotic Prescribing for COPD Exacerbations. *N Engl J Med*. 2019;381(2):111-120.

- 1  
2  
3  
4 10. Anthonisen NR, Manfreda J, Warren CP, Hershfield ES, Harding GK, Nelson  
5 NA. Antibiotic therapy in exacerbations of chronic obstructive pulmonary  
6 disease. *Ann Intern Med.* 1987;106(2):196-204.  
7
- 8  
9 11. Global Initiative for Chronic Obstructive Lung Disease. Global strategy for the  
10 diagnosis, management, and prevention of chronic obstructive pulmonary  
11 disease. GOLD, 2020.  
12
- 13 12. Brusse-Keizer MG, Grotenhuis AJ, Kerstjens HA, et al. Relation of sputum  
14 colour to bacterial load in acute exacerbations of COPD. *Respiratory medicine.*  
15 2009;103(4):601-606.  
16
- 17 13. Daniels JM, de Graaff CS, Vlaspolder F, Snijders D, Jansen HM, Boersma WG.  
18 Sputum colour reported by patients is not a reliable marker of the presence of  
19 bacteria in acute exacerbations of chronic obstructive pulmonary disease.  
20 *Clinical microbiology and infection : the official publication of the European  
21 Society of Clinical Microbiology and Infectious Diseases.* 2010;16(6):583-588.  
22
- 23 14. Christ-Crain M, Jaccard-Stolz D, Bingisser R, et al. Effect of procalcitonin-  
24 guided treatment on antibiotic use and outcome in lower respiratory tract  
25 infections: cluster-randomised, single-blinded intervention trial. *Lancet.*  
26 2004;363(9409):600-607.  
27
- 28 15. Kristoffersen KB, Sogaard OS, Wejse C, et al. Antibiotic treatment interruption  
29 of suspected lower respiratory tract infections based on a single procalcitonin  
30 measurement at hospital admission--a randomized trial. *Clinical microbiology  
31 and infection : the official publication of the European Society of Clinical  
32 Microbiology and Infectious Diseases.* 2009;15(5):481-487.  
33
- 34 16. Schuetz P, Christ-Crain M, Thomann R, et al. Effect of procalcitonin-based  
35 guidelines vs standard guidelines on antibiotic use in lower respiratory tract  
36 infections: the ProHOSP randomized controlled trial. *JAMA.*  
37 2009;302(10):1059-1066.  
38
- 39 17. Stolz D, Christ-Crain M, Bingisser R, et al. Antibiotic treatment of  
40 exacerbations of COPD: a randomized, controlled trial comparing  
41 procalcitonin-guidance with standard therapy. *Chest.* 2007;131(1):9-19.  
42  
43  
44  
45  
46  
47  
48  
49  
50  
51  
52  
53  
54  
55  
56  
57  
58  
59  
60

- 1  
2  
3  
4 18. Wang JX, Zhang SM, Li XH, Zhang Y, Xu ZY, Cao B. Acute exacerbations of  
5 chronic obstructive pulmonary disease with low serum procalcitonin values do  
6 not benefit from antibiotic treatment: a prospective randomized controlled trial.  
7  
8  
9  
10  
11  
12  
13  
14  
15  
16  
17  
18  
19  
20  
21  
22  
23  
24  
25  
26  
27  
28  
29  
30  
31  
32  
33  
34  
35  
36  
37  
38  
39  
40  
41  
42  
43  
44  
45  
46  
47  
48  
49  
50  
51  
52  
53  
54  
55  
56  
57  
58  
59  
60  
20. Assink-de Jong E, de Lange DW, van Oers JA, Nijsten MW, Twisk JW,  
Beishuizen A. Stop Antibiotics on guidance of Procalcitonin Study (SAPS): a  
randomised prospective multicenter investigator-initiated trial to analyse  
whether daily measurements of procalcitonin versus a standard-of-care  
approach can safely shorten antibiotic duration in intensive care unit patients--  
calculated sample size: 1816 patients. *BMC Infect Dis*. 2013;13:178.
21. Chow AW, Hall CB, Klein JO, Kammer RB, Meyer RD, Remington JS.  
Evaluation of new anti-infective drugs for the treatment of respiratory tract  
infections. Infectious Diseases Society of America and the Food and Drug  
Administration. *Clin Infect Dis*. 1992;15 Suppl 1:S62-88.
22. Jones PW, Harding G, Berry P, Wiklund I, Chen WH, Kline Leidy N.  
Development and first validation of the COPD Assessment Test. *Eur Respir J*.  
2009;34(3):648-654.
23. Fletcher CM. Standardised questionnaire on respiratory symptoms: a statement  
prepared and approved by the MRC Committee on the Aetiology of Chronic  
Bronchitis (MRC breathlessness score). *BMJ* 1960; 2: 1662.
24. Prins HJ, Duijkers R, Lutter R, et al. Blood eosinophilia as a marker of early  
and late treatment failure in severe acute exacerbations of COPD. *Respiratory  
medicine*. 2017;131:118-124.
25. Rohde GG, Koch A, Welte T, group As. Randomized double blind placebo-  
controlled study to demonstrate that antibiotics are not needed in moderate acute  
exacerbations of COPD--the ABACOPD study. *BMC pulmonary medicine*.

- 2015;15:5.
26. Llor C, Moragas A, Hernandez S, Bayona C, Miravittles M. Efficacy of antibiotic therapy for acute exacerbations of mild to moderate chronic obstructive pulmonary disease. *Am J Respir Crit Care Med.* 2012;186(8):716-723.
  27. Miravittles M, Moragas A, Hernandez S, Bayona C, Llor C. Is it possible to identify exacerbations of mild to moderate COPD that do not require antibiotic treatment? *Chest.* 2013;144(5):1571-1577.
  28. van Velzen P, Ter Riet G, Bresser P, et al. Doxycycline for outpatient-treated acute exacerbations of COPD: a randomised double-blind placebo-controlled trial. *Lancet Respir Med.* 2017;5(6):492-499.
  29. Assicot M, Gendrel D, Carsin H, Raymond J, Guilbaud J, Bohuon C. High serum procalcitonin concentrations in patients with sepsis and infection. *Lancet.* 1993;341(8844):515-518.
  30. Harbarth S, Holeckova K, Froidevaux C, et al. Diagnostic value of procalcitonin, interleukin-6, and interleukin-8 in critically ill patients admitted with suspected sepsis. *Am J Respir Crit Care Med.* 2001;164(3):396-402.
  31. Simon L, Gauvin F, Amre DK, Saint-Louis P, Lacroix J. Serum procalcitonin and C-reactive protein levels as markers of bacterial infection: a systematic review and meta-analysis. *Clin Infect Dis.* 2004;39(2):206-217.
  32. Mathioudakis AG, Chatzimavridou-Grigoriadou V, Corlateanu A, Vestbo J. Procalcitonin to guide antibiotic administration in COPD exacerbations: a meta-analysis. *European respiratory review : an official journal of the European Respiratory Society.* 2017;26(143).

Table 1. Eligibility criteria

| Inclusion criteria                                                         | Exclusion criteria                                                                                      |
|----------------------------------------------------------------------------|---------------------------------------------------------------------------------------------------------|
| - Hospitalized patients with AECOPD*                                       | - Fever, Axillary temperature $\geq 38^{\circ}\text{C}$                                                 |
| - $\geq 40$ years of age                                                   | - Pneumonia identified by X-Ray or CT of the chest                                                      |
| - Able to understand and communicate to ensure the completion of the trial | - Severe respiratory failure requiring admittance to ICU                                                |
| - Voluntary participation and provide written informed consent             | - Concurrent infection at another site (e.g. urinary tract infection)                                   |
|                                                                            | - Immunosuppression secondary to chemotherapy, AIDS or malignant tumor of blood system                  |
|                                                                            | - Comorbidities requiring corticosteroids (at least prednisone 30mg/d or equivalent more than 30 days ) |
|                                                                            | - Invasive mechanical ventilation                                                                       |
|                                                                            | - Patients with malignant tumors receiving chemotherapy or radiotherapy                                 |
|                                                                            | - Pregnancy                                                                                             |
|                                                                            | - Participation in another clinical trial                                                               |
|                                                                            | - Previously enrollment into the study                                                                  |
|                                                                            | - Refuse to attend                                                                                      |

AECOPD: acute exacerbation of chronic obstructive pulmonary disease; CT: computer tomography; ICU: intensive care unit.

\* The diagnostic criteria for AECOPD is based on the recommendation in GOLD guideline.<sup>5</sup>

Table 2. Antibiotic prescription strategy in both arms

| GOLD guideline-guided antibiotic recommendations                                                                                                                                                                                                                                             |                      |
|----------------------------------------------------------------------------------------------------------------------------------------------------------------------------------------------------------------------------------------------------------------------------------------------|----------------------|
| Patients with exacerbations of COPD who have three cardinal symptoms: increase in dyspnea, sputum volume, and sputum purulence; have two of the cardinal symptoms, if increased purulence of sputum is one of the two symptoms; or require mechanical ventilation (invasive or noninvasive). |                      |
| PCT-guided antibiotic regimen                                                                                                                                                                                                                                                                |                      |
| PCT<0.1ng/ml                                                                                                                                                                                                                                                                                 | Strongly discouraged |
| PCT (0.1-0.25ng/ml) and no sputum purulence                                                                                                                                                                                                                                                  | discouraged          |
| PCT (0.1-0.25ng/ml) and sputum purulence                                                                                                                                                                                                                                                     | Recommended          |
| PCT>0.25 ng/ml                                                                                                                                                                                                                                                                               | Strongly recommended |

PCT: procalcitonin; GOLD: The Global Initiative for Chronic Obstructive Pulmonary Disease.



Table 3. Schedule of assessments and data collection

| Assessment                       | At time of consent | Day 1<br>(face to face) | Day 3<br>(face to face) | Day 14<br>(face to face or telephone) | Day 30<br>(face to face) |
|----------------------------------|--------------------|-------------------------|-------------------------|---------------------------------------|--------------------------|
| Assessment of eligibility        | ×                  |                         |                         |                                       |                          |
| Written informed consent         | ×                  |                         |                         |                                       |                          |
| Basic information                | ×                  |                         |                         |                                       |                          |
| Medication history               | ×                  |                         |                         |                                       |                          |
| Physical examination             | ×                  |                         | ×                       |                                       | ×                        |
| PCT level                        | ×                  |                         |                         |                                       |                          |
| CAT score                        | ×                  |                         |                         |                                       | ×                        |
| mMRC score                       | ×                  |                         |                         |                                       | ×                        |
| Antibiotic prescription          | ×                  | ×                       | ×                       | ×                                     | ×                        |
| Other medicine for AECOPD        | ×                  | ×                       | ×                       | ×                                     | ×                        |
| Sputum gram staining and culture | ×                  |                         |                         |                                       |                          |
| Lung function                    | ×                  |                         |                         |                                       | ×                        |
| Assessment of therapeutic        |                    | ×                       | ×                       | ×                                     | ×                        |
| Adverse effects                  | ×                  | ×                       | ×                       | ×                                     | ×                        |
| Length of hospital stay          |                    |                         |                         |                                       | ×                        |
| Mortality                        |                    |                         |                         |                                       | ×                        |

PCT: procalcitonin; CAT: COPD assessment test; mMRC; modified Medical Research Council.



Figure 1 The flow chart of enrolled participants.

103x162mm (72 x 72 DPI)

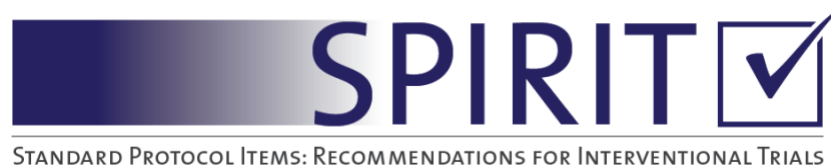

STANDARD PROTOCOL ITEMS: RECOMMENDATIONS FOR INTERVENTIONAL TRIALS

## SPIRIT 2013 Checklist: Recommended items to address in a clinical trial protocol and related documents\*

| Section/item                      | Item No | Description                                                                                                                                                                                                                                                                              | Addressed on page number |
|-----------------------------------|---------|------------------------------------------------------------------------------------------------------------------------------------------------------------------------------------------------------------------------------------------------------------------------------------------|--------------------------|
| <b>Administrative information</b> |         |                                                                                                                                                                                                                                                                                          |                          |
| Title                             | 1       | Descriptive title identifying the study design, population, interventions, and, if applicable, trial acronym                                                                                                                                                                             | _____ 1 _____            |
| Trial registration                | 2a      | Trial identifier and registry name. If not yet registered, name of intended registry                                                                                                                                                                                                     | _____ 2 _____            |
|                                   | 2b      | All items from the World Health Organization Trial Registration Data Set                                                                                                                                                                                                                 | _____ 2 _____            |
| Protocol version                  | 3       | Date and version identifier                                                                                                                                                                                                                                                              | 20200101-<br>Version1.0  |
| Funding                           | 4       | Sources and types of financial, material, and other support                                                                                                                                                                                                                              | _____ 13 _____           |
| Roles and responsibilities        | 5a      | Names, affiliations, and roles of protocol contributors                                                                                                                                                                                                                                  | _____ 1,13 _____         |
|                                   | 5b      | Name and contact information for the trial sponsor                                                                                                                                                                                                                                       | _____ 13 _____           |
|                                   | 5c      | Role of study sponsor and funders, if any, in study design; collection, management, analysis, and interpretation of data; writing of the report; and the decision to submit the report for publication, including whether they will have ultimate authority over any of these activities | _____ 13 _____           |
|                                   | 5d      | Composition, roles, and responsibilities of the coordinating centre, steering committee, endpoint adjudication committee, data management team, and other individuals or groups overseeing the trial, if applicable (see Item 21a for data monitoring committee)                         | _____ 10 _____           |

1 **Introduction**

2

3 Background and rationale 6a Description of research question and justification for undertaking the trial, including summary of relevant studies (published and unpublished) examining benefits and harms for each intervention \_\_\_\_\_ 4,5 \_\_\_\_\_

4

5

6 6b Explanation for choice of comparators \_\_\_\_\_ 4,5 \_\_\_\_\_

7

8 Objectives 7 Specific objectives or hypotheses \_\_\_\_\_ 6 \_\_\_\_\_

9

10 Trial design 8 Description of trial design including type of trial (eg, parallel group, crossover, factorial, single group), allocation ratio, and framework (eg, superiority, equivalence, noninferiority, exploratory) \_\_\_\_\_ 6 \_\_\_\_\_

11

12

13

14 **Methods: Participants, interventions, and outcomes**

15

16 Study setting 9 Description of study settings (eg, community clinic, academic hospital) and list of countries where data will be collected. Reference to where list of study sites can be obtained \_\_\_\_\_ 6 \_\_\_\_\_

17

18

19 Eligibility criteria 10 Inclusion and exclusion criteria for participants. If applicable, eligibility criteria for study centres and individuals who will perform the interventions (eg, surgeons, psychotherapists) \_\_\_\_\_ 6 \_\_\_\_\_

20

21

22 Interventions 11a Interventions for each group with sufficient detail to allow replication, including how and when they will be administered \_\_\_\_\_ 7 \_\_\_\_\_

23

24

25 11b Criteria for discontinuing or modifying allocated interventions for a given trial participant (eg, drug dose change in response to harms, participant request, or improving/worsening disease) \_\_\_\_\_ 7 \_\_\_\_\_

26

27

28 11c Strategies to improve adherence to intervention protocols, and any procedures for monitoring adherence (eg, drug tablet return, laboratory tests) \_\_\_\_\_ 7 \_\_\_\_\_

29

30

31 11d Relevant concomitant care and interventions that are permitted or prohibited during the trial \_\_\_\_\_ 7 \_\_\_\_\_

32

33

34 Outcomes 12 Primary, secondary, and other outcomes, including the specific measurement variable (eg, systolic blood pressure), analysis metric (eg, change from baseline, final value, time to event), method of aggregation (eg, median, proportion), and time point for each outcome. Explanation of the clinical relevance of chosen efficacy and harm outcomes is strongly recommended \_\_\_\_\_ 8 \_\_\_\_\_

35

36

37

38

39

40 Participant timeline 13 Time schedule of enrolment, interventions (including any run-ins and washouts), assessments, and visits for participants. A schematic diagram is highly recommended (see Figure) \_\_\_\_\_ 6,7 \_\_\_\_\_

41

42

43

44

45

46

1 Sample size 14 Estimated number of participants needed to achieve study objectives and how it was determined, including \_\_\_\_\_ 9,10\_\_\_\_\_

2 clinical and statistical assumptions supporting any sample size calculations

3

4 Recruitment 15 Strategies for achieving adequate participant enrolment to reach target sample size \_\_\_\_\_ 6\_\_\_\_\_

5

6 **Methods: Assignment of interventions (for controlled trials)**

7

8 Allocation:

9

10 Sequence 16a Method of generating the allocation sequence (eg, computer-generated random numbers), and list of any \_\_\_\_\_7\_\_\_\_\_

11 generation factors for stratification. To reduce predictability of a random sequence, details of any planned restriction

12 (eg, blocking) should be provided in a separate document that is unavailable to those who enrol participants

13 or assign interventions

14

15

16 Allocation 16b Mechanism of implementing the allocation sequence (eg, central telephone; sequentially numbered, \_\_\_\_\_7\_\_\_\_\_

17 concealment opaque, sealed envelopes), describing any steps to conceal the sequence until interventions are assigned

18 mechanism

19

20 Implementation 16c Who will generate the allocation sequence, who will enrol participants, and who will assign participants to \_\_\_\_\_7\_\_\_\_\_

21 interventions

22

23

24 Blinding (masking) 17a Who will be blinded after assignment to interventions (eg, trial participants, care providers, outcome \_\_\_\_\_7\_\_\_\_\_

25 assessors, data analysts), and how

26

27 17b If blinded, circumstances under which unblinding is permissible, and procedure for revealing a participant's \_\_\_\_\_7\_\_\_\_\_

28 allocated intervention during the trial

29

30

31 **Methods: Data collection, management, and analysis**

32

33 Data collection 18a Plans for assessment and collection of outcome, baseline, and other trial data, including any related \_\_\_\_\_10\_\_\_\_\_

34 methods processes to promote data quality (eg, duplicate measurements, training of assessors) and a description of

35 study instruments (eg, questionnaires, laboratory tests) along with their reliability and validity, if known.

36 Reference to where data collection forms can be found, if not in the protocol

37

38

39 18b Plans to promote participant retention and complete follow-up, including list of any outcome data to be \_\_\_\_\_10\_\_\_\_\_

40 collected for participants who discontinue or deviate from intervention protocols

41

|    |                                 |     |                                                                                                                                                                                                                                                                                                                                       |                  |
|----|---------------------------------|-----|---------------------------------------------------------------------------------------------------------------------------------------------------------------------------------------------------------------------------------------------------------------------------------------------------------------------------------------|------------------|
| 1  | Data management                 | 19  | Plans for data entry, coding, security, and storage, including any related processes to promote data quality (eg, double data entry; range checks for data values). Reference to where details of data management procedures can be found, if not in the protocol                                                                     | _____ 10_____    |
| 2  |                                 |     |                                                                                                                                                                                                                                                                                                                                       |                  |
| 3  |                                 |     |                                                                                                                                                                                                                                                                                                                                       |                  |
| 4  |                                 |     |                                                                                                                                                                                                                                                                                                                                       |                  |
| 5  | Statistical methods             | 20a | Statistical methods for analysing primary and secondary outcomes. Reference to where other details of the statistical analysis plan can be found, if not in the protocol                                                                                                                                                              | ___ 10,11_____   |
| 6  |                                 |     |                                                                                                                                                                                                                                                                                                                                       |                  |
| 7  |                                 |     |                                                                                                                                                                                                                                                                                                                                       |                  |
| 8  |                                 | 20b | Methods for any additional analyses (eg, subgroup and adjusted analyses)                                                                                                                                                                                                                                                              | ___ 10,11_____   |
| 9  |                                 |     |                                                                                                                                                                                                                                                                                                                                       |                  |
| 10 |                                 | 20c | Definition of analysis population relating to protocol non-adherence (eg, as randomised analysis), and any statistical methods to handle missing data (eg, multiple imputation)                                                                                                                                                       | _____ 10,11_____ |
| 11 |                                 |     |                                                                                                                                                                                                                                                                                                                                       |                  |
| 12 |                                 |     |                                                                                                                                                                                                                                                                                                                                       |                  |
| 13 |                                 |     |                                                                                                                                                                                                                                                                                                                                       |                  |
| 14 | <b>Methods: Monitoring</b>      |     |                                                                                                                                                                                                                                                                                                                                       |                  |
| 15 |                                 |     |                                                                                                                                                                                                                                                                                                                                       |                  |
| 16 | Data monitoring                 | 21a | Composition of data monitoring committee (DMC); summary of its role and reporting structure; statement of whether it is independent from the sponsor and competing interests; and reference to where further details about its charter can be found, if not in the protocol. Alternatively, an explanation of why a DMC is not needed | _____ 10_____    |
| 17 |                                 |     |                                                                                                                                                                                                                                                                                                                                       |                  |
| 18 |                                 |     |                                                                                                                                                                                                                                                                                                                                       |                  |
| 19 |                                 |     |                                                                                                                                                                                                                                                                                                                                       |                  |
| 20 |                                 |     |                                                                                                                                                                                                                                                                                                                                       |                  |
| 21 |                                 |     |                                                                                                                                                                                                                                                                                                                                       |                  |
| 22 |                                 | 21b | Description of any interim analyses and stopping guidelines, including who will have access to these interim results and make the final decision to terminate the trial                                                                                                                                                               | _____ 10_____    |
| 23 |                                 |     |                                                                                                                                                                                                                                                                                                                                       |                  |
| 24 |                                 |     |                                                                                                                                                                                                                                                                                                                                       |                  |
| 25 | Harms                           | 22  | Plans for collecting, assessing, reporting, and managing solicited and spontaneously reported adverse events and other unintended effects of trial interventions or trial conduct                                                                                                                                                     | _____ 9_____     |
| 26 |                                 |     |                                                                                                                                                                                                                                                                                                                                       |                  |
| 27 |                                 |     |                                                                                                                                                                                                                                                                                                                                       |                  |
| 28 | Auditing                        | 23  | Frequency and procedures for auditing trial conduct, if any, and whether the process will be independent from investigators and the sponsor                                                                                                                                                                                           | _____ NA_____    |
| 29 |                                 |     |                                                                                                                                                                                                                                                                                                                                       |                  |
| 30 |                                 |     |                                                                                                                                                                                                                                                                                                                                       |                  |
| 31 |                                 |     |                                                                                                                                                                                                                                                                                                                                       |                  |
| 32 | <b>Ethics and dissemination</b> |     |                                                                                                                                                                                                                                                                                                                                       |                  |
| 33 |                                 |     |                                                                                                                                                                                                                                                                                                                                       |                  |
| 34 | Research ethics approval        | 24  | Plans for seeking research ethics committee/institutional review board (REC/IRB) approval                                                                                                                                                                                                                                             | _____ 6_____     |
| 35 |                                 |     |                                                                                                                                                                                                                                                                                                                                       |                  |
| 36 |                                 |     |                                                                                                                                                                                                                                                                                                                                       |                  |
| 37 | Protocol amendments             | 25  | Plans for communicating important protocol modifications (eg, changes to eligibility criteria, outcomes, analyses) to relevant parties (eg, investigators, REC/IRBs, trial participants, trial registries, journals, regulators)                                                                                                      | _____ 6_____     |
| 38 |                                 |     |                                                                                                                                                                                                                                                                                                                                       |                  |
| 39 |                                 |     |                                                                                                                                                                                                                                                                                                                                       |                  |
| 40 |                                 |     |                                                                                                                                                                                                                                                                                                                                       |                  |
| 41 |                                 |     |                                                                                                                                                                                                                                                                                                                                       |                  |
| 42 |                                 |     |                                                                                                                                                                                                                                                                                                                                       |                  |
| 43 |                                 |     |                                                                                                                                                                                                                                                                                                                                       |                  |
| 44 |                                 |     |                                                                                                                                                                                                                                                                                                                                       |                  |
| 45 |                                 |     |                                                                                                                                                                                                                                                                                                                                       |                  |
| 46 |                                 |     |                                                                                                                                                                                                                                                                                                                                       |                  |

|    |                               |     |                                                                                                                                                                                                                                                                                     |                               |
|----|-------------------------------|-----|-------------------------------------------------------------------------------------------------------------------------------------------------------------------------------------------------------------------------------------------------------------------------------------|-------------------------------|
| 1  | Consent or assent             | 26a | Who will obtain informed consent or assent from potential trial participants or authorised surrogates, and how (see Item 32)                                                                                                                                                        | _____ 6 _____                 |
| 2  |                               |     |                                                                                                                                                                                                                                                                                     |                               |
| 3  |                               |     |                                                                                                                                                                                                                                                                                     |                               |
| 4  |                               | 26b | Additional consent provisions for collection and use of participant data and biological specimens in ancillary studies, if applicable                                                                                                                                               | _____ 6 _____                 |
| 5  |                               |     |                                                                                                                                                                                                                                                                                     |                               |
| 6  |                               |     |                                                                                                                                                                                                                                                                                     |                               |
| 7  | Confidentiality               | 27  | How personal information about potential and enrolled participants will be collected, shared, and maintained in order to protect confidentiality before, during, and after the trial                                                                                                | _____ 10 _____                |
| 8  |                               |     |                                                                                                                                                                                                                                                                                     |                               |
| 9  |                               |     |                                                                                                                                                                                                                                                                                     |                               |
| 10 | Declaration of interests      | 28  | Financial and other competing interests for principal investigators for the overall trial and each study site                                                                                                                                                                       | _____ 13 _____                |
| 11 |                               |     |                                                                                                                                                                                                                                                                                     |                               |
| 12 |                               |     |                                                                                                                                                                                                                                                                                     |                               |
| 13 | Access to data                | 29  | Statement of who will have access to the final trial dataset, and disclosure of contractual agreements that limit such access for investigators                                                                                                                                     | _____ 13 _____                |
| 14 |                               |     |                                                                                                                                                                                                                                                                                     |                               |
| 15 |                               |     |                                                                                                                                                                                                                                                                                     |                               |
| 16 | Ancillary and post-trial care | 30  | Provisions, if any, for ancillary and post-trial care, and for compensation to those who suffer harm from trial participation                                                                                                                                                       | Supplementary file 3<br>_____ |
| 17 |                               |     |                                                                                                                                                                                                                                                                                     |                               |
| 18 |                               |     |                                                                                                                                                                                                                                                                                     |                               |
| 19 |                               |     |                                                                                                                                                                                                                                                                                     |                               |
| 20 | Dissemination policy          | 31a | Plans for investigators and sponsor to communicate trial results to participants, healthcare professionals, the public, and other relevant groups (eg, via publication, reporting in results databases, or other data sharing arrangements), including any publication restrictions | _____ 13 _____                |
| 21 |                               |     |                                                                                                                                                                                                                                                                                     |                               |
| 22 |                               |     |                                                                                                                                                                                                                                                                                     |                               |
| 23 |                               |     |                                                                                                                                                                                                                                                                                     |                               |
| 24 |                               | 31b | Authorship eligibility guidelines and any intended use of professional writers                                                                                                                                                                                                      | _____ 13 _____                |
| 25 |                               |     |                                                                                                                                                                                                                                                                                     |                               |
| 26 |                               | 31c | Plans, if any, for granting public access to the full protocol, participant-level dataset, and statistical code                                                                                                                                                                     | _____ 13 _____                |
| 27 |                               |     |                                                                                                                                                                                                                                                                                     |                               |
| 28 |                               |     |                                                                                                                                                                                                                                                                                     |                               |
| 29 | <b>Appendices</b>             |     |                                                                                                                                                                                                                                                                                     |                               |
| 30 |                               |     |                                                                                                                                                                                                                                                                                     |                               |
| 31 | Informed consent materials    | 32  | Model consent form and other related documentation given to participants and authorised surrogates                                                                                                                                                                                  | Supplementary file 3<br>_____ |
| 32 |                               |     |                                                                                                                                                                                                                                                                                     |                               |
| 33 |                               |     |                                                                                                                                                                                                                                                                                     |                               |
| 34 | Biological specimens          | 33  | Plans for collection, laboratory evaluation, and storage of biological specimens for genetic or molecular analysis in the current trial and for future use in ancillary studies, if applicable                                                                                      | _____ NA _____                |
| 35 |                               |     |                                                                                                                                                                                                                                                                                     |                               |
| 36 |                               |     |                                                                                                                                                                                                                                                                                     |                               |

37 \*It is strongly recommended that this checklist be read in conjunction with the SPIRIT 2013 Explanation & Elaboration for important clarification on the items.  
 38 Amendments to the protocol should be tracked and dated. The SPIRIT checklist is copyrighted by the SPIRIT Group under the Creative Commons  
 39 "[Attribution-NonCommercial-NoDerivs 3.0 Unported](https://creativecommons.org/licenses/by-nc-nd/3.0/)" license.  
 40  
 41  
 42

## Supplementary material 2. The details of hospitals participating in this trial

| <b>Hospital</b>                                          | <b>Province, City</b> | <b>Location in China</b> | <b>Teaching hospital</b> | <b>Grade of hospital</b> |
|----------------------------------------------------------|-----------------------|--------------------------|--------------------------|--------------------------|
| China-Japan Friendship Hospital                          | Beijing               | North                    | Yes                      | Tertiary                 |
| Beijing Luhe Hospital, capital medical University        | Beijing               | North                    | Yes                      | Tertiary                 |
| Daxing Hospital Affiliated to Capital Medical University | Beijing               | North                    | Yes                      | Tertiary                 |
| Qingdao Municipal Hospital                               | Shandong              | East                     | Yes                      | Tertiary                 |
| Linzi district People's hospital                         | Shandong              | East                     | Yes                      | Tertiary                 |
| First Hospital of Shanxi Medical University              | Shanxi                | North                    | Yes                      | Tertiary                 |
| Hebei Provincial General Hospital                        | Hebei                 | North                    | Yes                      | Tertiary                 |
| First Affiliated Hospital of Guangxi Medical University  | Guangxi               | South                    | Yes                      | Tertiary                 |
| Xiangtan Central Hospital                                | Hunan                 | Central                  | Yes                      | Tertiary                 |
| First Affiliated Hospital of Wenzhou Medical University  | Zhejiang              | East                     | Yes                      | Tertiary                 |

Definition of Secondary and Tertiary hospital in China: The Secondary hospital is defined as a hospital providing medical, prevention, health care and rehabilitation services to multiple communities (with a radius of population more than 100,000 peoples); the Tertiary hospital is defined as a hospital providing medical service to the whole country beyond cities and provinces, with comprehensive medical, teaching and research ability.



## Informed Consent Form · Notice for Participants

Dear Mr/Ms \_\_\_\_\_:

You (/ your family) are currently hospitalized with acute exacerbation of chronic obstructive pulmonary disease (AECOPD). You are invited to attend a clinical study of AECOPD. Please read the following information as carefully as possible before you decide whether or not to participate in this study. It will help you understand the value and significance, the procedures and duration, as well as the possible benefits, discomfort and risks of participating in this study. If you want, you can also discuss it with your relatives, friends, or consult your doctor to help you make the decision. If you have any question, please do not hesitate to contact the doctor.

### 1. Background and objective

#### 1.1 Background

Chronic obstructive pulmonary disease (COPD) is currently the fourth leading cause of death in the world, but is projected to be the third by 2020. Acute exacerbations are the most common reason for hospitalization and death for patients with COPD. Not all patients with AECOPD would benefit from antibiotic therapy. Antibiotics overuse wastes medical resources, drives antimicrobial resistance, may cause side effects, negatively affects the microbiome of patients, and distracts from potentially more effective interventions. The GOLD guidelines have been recommended antibiotics prescription in patients of Anthonisen I and II with sputum purulence, as well as patients with mechanical ventilation, which has potential risk in overuse of antibiotics. Procalcitonin (PCT), a reliable biomarker of bacterial infection, has the potential to guide the prescription of antibiotics. In order to evaluate the efficacy of PCT to guide antibiotic management in patients with AECOPD, we aim to perform this multicenter, blind, randomized, controlled clinical trial.

#### 1.2 Objective

This study aim to determine whether PCT-guided antibiotic therapy will reduce the antibiotic prescription rate for AECOPD without negatively impacting the treatment success rate, compared with the GOLD guideline recommendations.

## 2. Research method

This study has been approved by the Medical Ethics Committee of China-Japan Friendship Hospital. This is a multicenter, randomized, controlled clinical trial which will be conducted in 10 tertiary general hospitals including China-Japan Friendship Hospital, and plans to recruit 500 eligible hospitalized patients with AECOPD to participate voluntarily.

Eligible participants will be randomly assigned to either the PCT-guided antibiotic therapy (PCT group) or the GOLD guideline antibiotic recommendations (guideline group) in a ratio of 1:1. The selection of different groups will not affect the routine treatment for you.

This study will record your personal and disease-related information, including medical history (such as vital signs), routine medical and laboratory examination results. In order to objectively evaluate the changes of your condition, you will be inquired in varying time points (screening period, day1, day 3, day 14 and day 30 after randomization) and the changes will be recorded. The follow-up will continue until day 30 after randomization.

The above routine treatment and medical examinations are all necessary for the clinical treatment of patients with AECOPD. This study does not involve any special examinations or treatment, nor add extra burden on patients.

## 3. Participants' Responsibility

During the study period, you (/your family) are required to follow the study protocol and undergoing the follow-up by your investigators about your (/your family) outcome.

## 4. Participants' Right

You (/your family) are voluntary to participate in this study. You should not feel any pressure to participate. You have the rights to refuse to attend this study, or at any time inform the investigator to request withdrawal from the study without any discrimination or retaliation. Your data will not be included in the study and any medical treatment. Your benefits will not be affected.

You can keep track of the information and progress of this research. If you have any questions about the study, or if you feel any discomfort during the research, or if the

study involves your rights, you can always consult the investigators. If you have any complaints, please contact the ethics committee of your hospital.

### **5. The possible benefits during the study**

You, people and society will probably benefit from this study, such as the potential avoidance of antibiotics use, and it may be helpful for other patients with similar condition. Treatment and related medical examinations will be performed according to the routine protocol of GOLD guideline regardless of your participation in this study. Investigators will follow up your health condition until day 30 after randomization, regardless you stay in hospital or not, and give you careful guidance.

### **6. The possible risks during the study**

The routine therapy for AECOPD is based on the GOLD guideline. A previous study has shown that recommending not antibiotic therapy for patients with PCT level less than 0.1ng/ml do not occur adverse outcome. If any adverse event occurs in this study, the Medical Experts Committee will identify whether it is related to the study. If the damage is related to the study, the cost of treatment and relevant economic compensation will be provided according to the provisions of China's "Good Clinical Practice (GCP).

### **7. Participants personal privacy protection**

If you (/your family) decide to participate in the study, your personal data in the study are confidential. In all medical records of this study, your name will be replaced by a Pinyin abbreviation. Your medical records and information will be kept in the hospital, only the investigator, research authority department, and ethics committee will be approved to access them. Any public report about the results of this study will not disclose your personal identity.

You (/your family) can choose not to attend this study, or to withdraw at any time without any discrimination or retaliation, and your medical treatment and benefits will not be affected.

Your (/your family's) participation in this study is voluntary. You (/your family) can keep track of the relevant information. If you have any questions related to this research,

1  
2  
3  
4 or you have a research-related injury, or have questions about the Participants' rights  
5 and interests, you can contact the investigator any time.  
6

7 In the case of an emergency, please contact the investigator:  
8

9 Contact phone number:  
10  
11  
12  
13  
14  
15  
16  
17  
18  
19  
20  
21  
22  
23  
24  
25  
26  
27  
28  
29  
30  
31  
32  
33  
34  
35  
36  
37  
38  
39  
40  
41  
42  
43  
44  
45  
46  
47  
48  
49  
50  
51  
52  
53  
54  
55  
56  
57  
58  
59  
60

For peer review only

## Participants' informed consent form

I have read the introduction of this trial and have the opportunity to discuss and ask questions with my doctor about this trial. All my questions were answered satisfactorily. I know the risks and benefits of participating in this trial, and I understand that participating in this trial is voluntary. I inquired about the details of the trial and all the relevant questions were answered. At the same time, my family and I have plenty of time to consider, but also a clear understanding of the following:

1. I can consult my doctor for more information at any time.
2. All my personal information is confidential; my privacy and right to know will be kept confidential.
3. I can withdraw from this trial at any time without discrimination or retaliation, and medical treatment will not be affected.
4. I agree that investigators, research authorities and ethics committees should consult my medical records after approval.
5. I will get a signed and dated copy of the informed consent.

I decided to agree to participate in this trial and try to comply with the doctor's advice.

Participant or legal representative signature:

Signature date:

Contact phone number:

The relationship between the signer and the subject:

I confirm that I have accurately explained to the subject the details of the trial, including its rights, possible benefits and risks, and answered all questions.

The participant volunteered to participate in the trial and had given a signed copy of the informed consent.

Investigator signature:

Signature date:

Contact phone number:
