# Supplementary material for: Procalcitonin-guided initiation of antibiotics in AECOPD inpatients: study protocol for a multicenter randomised controlled trial
Source: PubMed Central journal article supplement — BMJ Open. 2021 Aug 5;11(8):e049515. doi: 10.1136/bmjopen-2021-049515 (PMC8344287; doi:10.1136/bmjopen-2021-049515), 2021-08-05
Supplement: bmjopen-2021-049515supp002.pdf [file bmjopen-2021-049515supp002.pdf]

## Supplementary material 2. The details of hospitals participating in this trial

| <b>Hospital</b>                                          | <b>Province, City</b> | <b>Location in China</b> | <b>Teaching hospital</b> | <b>Grade of hospital</b> |
|----------------------------------------------------------|-----------------------|--------------------------|--------------------------|--------------------------|
| China-Japan Friendship Hospital                          | Beijing               | North                    | Yes                      | Tertiary                 |
| Beijing Luhe Hospital, capital medical University        | Beijing               | North                    | Yes                      | Tertiary                 |
| Daxing Hospital Affiliated to Capital Medical University | Beijing               | North                    | Yes                      | Tertiary                 |
| Qingdao Municipal Hospital                               | Shandong              | East                     | Yes                      | Tertiary                 |
| Linzi district People's hospital                         | Shandong              | East                     | Yes                      | Tertiary                 |
| First Hospital of Shanxi Medical University              | Shanxi                | North                    | Yes                      | Tertiary                 |
| Hebei Provincial General Hospital                        | Hebei                 | North                    | Yes                      | Tertiary                 |
| First Affiliated Hospital of Guangxi Medical University  | Guangxi               | South                    | Yes                      | Tertiary                 |
| Xiangtan Central Hospital                                | Hunan                 | Central                  | Yes                      | Tertiary                 |
| First Affiliated Hospital of Wenzhou Medical University  | Zhejiang              | East                     | Yes                      | Tertiary                 |

Definition of Secondary and Tertiary hospital in China: The Secondary hospital is defined as a hospital providing medical, prevention, health care and rehabilitation services to multiple communities (with a radius of population more than 100,000 peoples); the Tertiary hospital is defined as a hospital providing medical service to the whole country beyond cities and provinces, with comprehensive medical, teaching and research ability.
